# Supplementary material for: Oxidised IL-33 drives COPD epithelial pathogenesis via ST2-independent RAGE/EGFR signalling complex
Source: PubMed Central journal article supplement — Eur Respir J. 2023 Sep 28;62(3):2202210. doi: 10.1183/13993003.02210-2022 (PMC10533947; doi:10.1183/13993003.02210-2022), 2023-09-28
Supplement: ERJ-02210-2022.Shareable.pdf [file ERJ-02210-2022.Shareable.pdf]

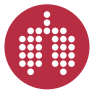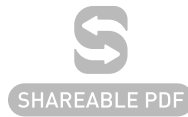

## Oxidised IL-33 drives COPD epithelial pathogenesis *via* ST2-independent RAGE/EGFR signalling complex

Sam Strickson , Kirsty F. Houslay, Victor A. Negri, Yoichiro Ohne , Tomas Ottosson, Roger B. Dodd , Catherine Chaillan Huntington, Tina Baker, Jingjing Li, Katherine E. Stephenson, Andy J. O'Connor, J. Sophie Sagawe , Helen Killick, Tom Moore, D. Gareth Rees, Sofia Koch, Caroline Sanden, Yixin Wang, Elise Gubbins, Mahboobe Ghaedi, Roland Kolbeck, Saumyaa Saumyaa, Jonas S. Erjefält , Gary P. Sims, Alison A. Humbles, Ian C. Scott, Xavier Romero Ros and E. Suzanne Cohen

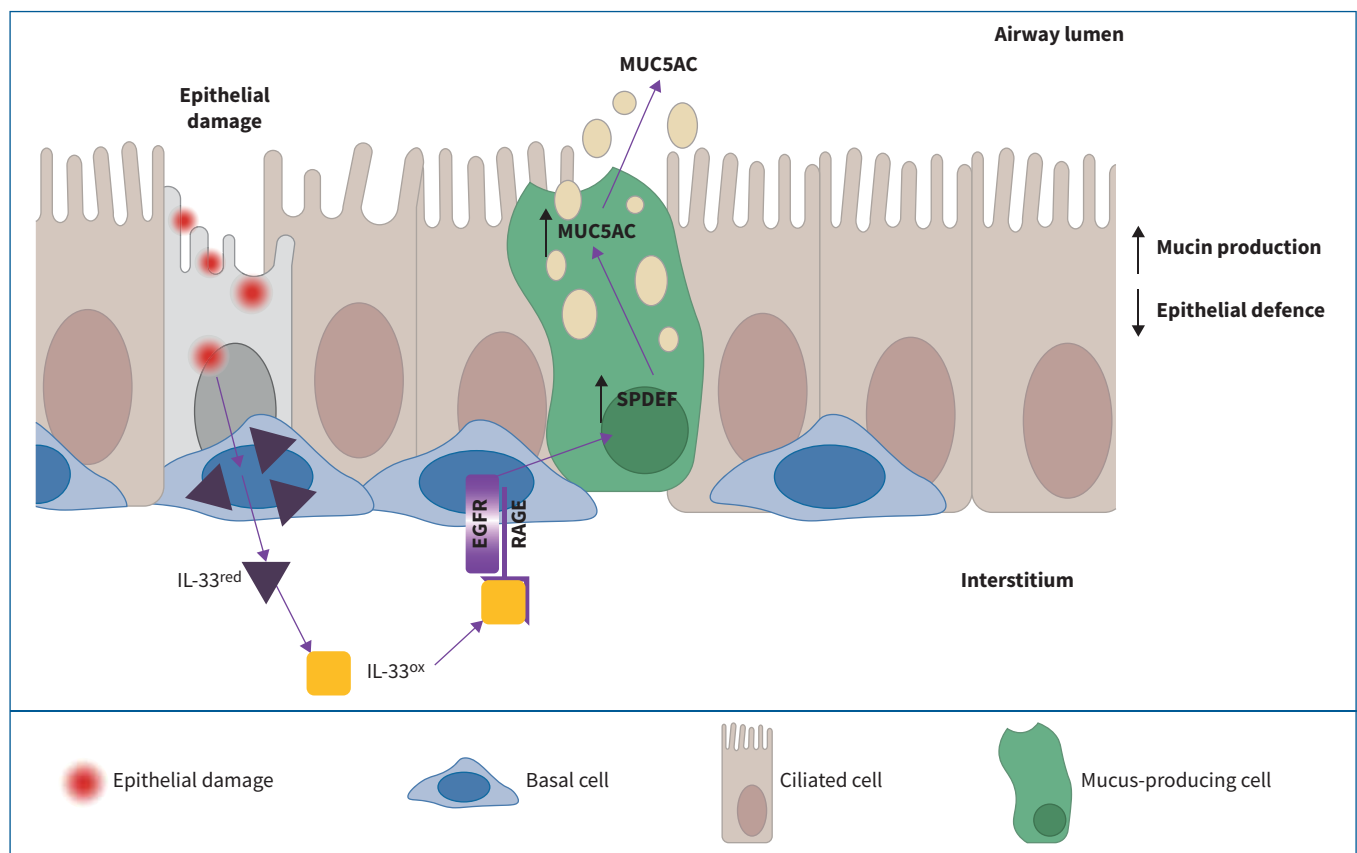

**GRAPHICAL ABSTRACT** IL-33<sup>ox</sup> binds to receptor for advanced glycation end products (RAGE) to signal via epidermal growth factor receptor (EGFR). Activation of the IL-33<sup>ox</sup>-RAGE/EGFR pathway redirects epithelial cell fate, promoting a mucin hypersecretion phenotype at the expense of epithelial defence functions.

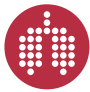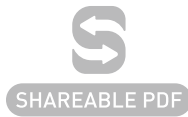

# Oxidised IL-33 drives COPD epithelial pathogenesis *via* ST2-independent RAGE/EGFR signalling complex

Sam Strickson <sup>1,16</sup>, Kirsty F. Houslay<sup>1,16</sup>, Victor A. Negri<sup>1</sup>, Yoichiro Ohne <sup>2</sup>, Tomas Ottosson<sup>3</sup>, Roger B. Dodd <sup>4</sup>, Catherine Chaillan Huntington<sup>4</sup>, Tina Baker<sup>5</sup>, Jingjing Li<sup>1</sup>, Katherine E. Stephenson<sup>1</sup>, Andy J. O'Connor<sup>1</sup>, J. Sophie Sagawe <sup>1</sup>, Helen Killick<sup>5</sup>, Tom Moore<sup>1</sup>, D. Gareth Rees<sup>4</sup>, Sofia Koch<sup>6</sup>, Caroline Sanden<sup>7,8</sup>, Yixin Wang<sup>9</sup>, Elise Gubbins<sup>1</sup>, Mahboobe Ghaedi<sup>10</sup>, Roland Kolbeck<sup>2,11</sup>, Saumyaa Saumyaa<sup>12</sup>, Jonas S. Erjefält <sup>7,13</sup>, Gary P. Sims<sup>14</sup>, Alison A. Humbles<sup>1,15</sup>, Ian C. Scott<sup>5</sup>, Xavier Romero Ros<sup>1,17</sup> and E. Suzanne Cohen<sup>1,17</sup>

<sup>1</sup>Bioscience Asthma and Skin Immunity, Research and Early Development, Respiratory & Immunology, BioPharmaceuticals R&D, AstraZeneca, Cambridge, UK. <sup>2</sup>Bioscience Asthma and Skin Immunity, Research and Early Development, Respiratory & Immunology, BioPharmaceuticals R&D, AstraZeneca, Gaithersburg, MD, USA. <sup>3</sup>Translational Science and Experimental Medicine, Research and Early Development, Respiratory & Immunology, BioPharmaceuticals R&D, AstraZeneca, Gothenburg, Sweden. <sup>4</sup>Biologics Engineering, R&D, AstraZeneca, Cambridge, UK. <sup>5</sup>Translational Science and Experimental Medicine, Research and Early Development, Respiratory & Immunology, BioPharmaceuticals R&D, AstraZeneca, Cambridge, UK. <sup>6</sup>Imaging & Data Analytics, Clinical Pharmacology and Safety Sciences, R&D, AstraZeneca, Cambridge, UK. <sup>7</sup>Experimental Medical Sciences, Lund University, Lund, Sweden. <sup>8</sup>Medetect AB, Lund, Sweden. <sup>9</sup>Imaging & Data Analytics, Clinical Pharmacology and Safety Sciences, R&D, AstraZeneca, Gothenburg, Sweden. <sup>10</sup>Bioscience COPD/IPF, Research and Early Development, Respiratory & Immunology, BioPharmaceuticals R&D, AstraZeneca, Gaithersburg, MD, USA. <sup>11</sup>Current: Spirovent Sciences, Philadelphia, PA, USA. <sup>12</sup>Discovery Biology, Discovery Sciences, R&D, AstraZeneca, Gothenburg, Sweden. <sup>13</sup>Allergology and Respiratory Medicine, Lund University, Skåne University Hospital, Lund, Sweden. <sup>14</sup>Bioscience Immunology, Research and Early Development, Respiratory & Immunology, BioPharmaceuticals R&D, AstraZeneca, Gaithersburg, MD, USA. <sup>15</sup>Current: Roche Pharma Research & Early Development, Roche Innovation Center Basel, F. Hoffmann-La Roche Ltd, Basel, Switzerland. <sup>16</sup>These authors contributed equally to this work. <sup>17</sup>These authors contributed equally to this work.

Corresponding author: E. Suzanne Cohen ([suzanne.cohen@astrazeneca.com](mailto:suzanne.cohen@astrazeneca.com))

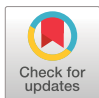

Shareable abstract (@ERSpublications)

An ST2-independent signalling complex of oxidised IL-33, receptor for advanced glycation end products (RAGE) and epidermal growth factor receptor (EGFR) governs epithelial remodelling and mucin hypersecretion in COPD <https://bit.ly/3pxgaqx>

Cite this article as: Strickson S, Houslay KF, Negri VA, et al. Oxidised IL-33 drives COPD epithelial pathogenesis *via* ST2-independent RAGE/EGFR signalling complex. *Eur Respir J* 2023; 62: 2202210 [DOI: 10.1183/13993003.02210-2022].

This extracted version can be shared freely online.

Copyright ©The authors 2023.

This version is distributed under the terms of the Creative Commons Attribution Non-Commercial Licence 4.0. For commercial reproduction rights and permissions contact [permissions@ersnet.org](mailto:permissions@ersnet.org)

This article has an editorial commentary: <https://doi.org/10.1183/13993003.01301-2023>

Received: 17 Nov 2022  
Accepted: 28 June 2023

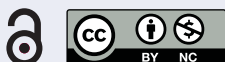

## Abstract

**Background** Epithelial damage, repair and remodelling are critical features of chronic airway diseases including chronic obstructive pulmonary disease (COPD). Interleukin (IL)-33 released from damaged airway epithelia causes inflammation *via* its receptor, serum stimulation-2 (ST2). Oxidation of IL-33 to a non-ST2-binding form (IL-33<sup>ox</sup>) is thought to limit its activity. We investigated whether IL-33<sup>ox</sup> has functional activities that are independent of ST2 in the airway epithelium.

**Methods** *In vitro* epithelial damage assays and three-dimensional, air-liquid interface (ALI) cell culture models of healthy and COPD epithelia were used to elucidate the functional role of IL-33<sup>ox</sup>. Transcriptomic changes occurring in healthy ALI cultures treated with IL-33<sup>ox</sup> and COPD ALI cultures treated with an IL-33-neutralising antibody were assessed with bulk and single-cell RNA sequencing analysis.

**Results** We demonstrate that IL-33<sup>ox</sup> forms a complex with receptor for advanced glycation end products (RAGE) and epidermal growth factor receptor (EGFR) expressed on airway epithelium. Activation of this alternative, ST2-independent pathway impaired epithelial wound closure and induced airway epithelial remodelling *in vitro*. IL-33<sup>ox</sup> increased the proportion of mucus-producing cells and reduced epithelial defence functions, mimicking pathogenic traits of COPD. Neutralisation of the IL-33<sup>ox</sup> pathway reversed these deleterious traits in COPD epithelia. Gene signatures defining the pathogenic effects of IL-33<sup>ox</sup> were enriched in airway epithelia from patients with severe COPD.

**Conclusions** Our study reveals for the first time that IL-33, RAGE and EGFR act together in an ST2-independent pathway in the airway epithelium and govern abnormal epithelial remodelling and mucobstructive features in COPD.
