# Supplementary material for: Oxidised IL-33 drives COPD epithelial pathogenesis via ST2-independent RAGE/EGFR signalling complex
Source: PubMed Central journal article supplement — Eur Respir J. 2023 Sep 28;62(3):2202210. doi: 10.1183/13993003.02210-2022 (PMC10533947; doi:10.1183/13993003.02210-2022), 2023-09-28
Supplement: ERJ-02210-2022.Supplement.pdf [file ERJ-02210-2022.Supplement.pdf]

## Online supplementary material

### Materials and methods

No statistical methods were used to predetermine sample size. Experiments were not randomised. Investigators were not blinded to allocation during experiments and outcome assessment, unless otherwise mentioned.

#### Submerged monolayer cell culture

According to the manufacturer's instructions, human bronchial epithelial (HBE) cells, normal HBE (NHBE) cells (Lonza, CC-2540) or diseased (COPD) HBE cells (Lonza, 00195275) (table 1 and 2) were cultured in complete BEGM (Lonza, CC-3171) with the supplement kit (Lonza, CC-4175). A549 cells (ATCC, CCL-185) were cultured in full RPMI medium with GlutaMAX (Thermo Fisher Scientific, 61870036), which contained 10% fetal bovine serum (FBS) and 1% penicillin/streptomycin. According to the manufacturer's protocol, human umbilical vein endothelial cells (HUVECs) were obtained from Cambrex (CC-2519) and maintained in EBM-2 culture (Lonza, CC-3162). Cells were harvested with accutase (PAA, L11-007), seeded at the indicated densities. Cells were washed and serum starved (BEGM [Lonza, CC-3171] without the supplement kit, or RPMI medium with GlutaMAX without FBS) and incubated at 37°C for 18–24 h.

#### Scratch wound healing assays in submerged monolayer cell cultures

Healthy NHBEs and COPD bronchial epithelial cells in complete BEGM or A549 cells in full RPMI medium were seeded at  $5 \times 10^5$  cells/100  $\mu$ L into Incucyte® Imagelock 96-well Plates (Sartorius, 4379) and incubated at 37°C for 18–24 h until confluent.

Cells were then washed with PBS and serum starved overnight. The next morning cells were scratched using a WoundMaker (Sartorius, 4493), washed with PBS and

May 2023

cultured in either BEBM (Lonza, CC-3171) for bronchial epithelial cells or RPMI medium with GlutaMAX for A549 cells. Both culture mediums were supplemented with 0.1% (v/v) FBS and 1% (v/v) penicillin/streptomycin. Cells were treated with 30 ng/ml of IL-33<sup>red</sup>, IL-33<sup>C>S</sup>, IL-33<sup>ox</sup>, EGF or sST2 with or without 10 µg/ml of IL-33-neutralising antibody (tozorakimab), ST2-neutralising antibody, EGFR-neutralising antibody, mouse IgG1 isotype control or human IgG1 isotype control, or left untreated, before being incubated at 37°C. IncucyteZOOM or Incucyte S3 (Essen Bioscience) systems were used for wound healing imaging and analysis over a 48-h period. Relative wound density (ratio of the occupied area to the total area of the initial scratched region) was calculated through the wound healing algorithm in the Incucyte ZOOM/S3 software.

### **Three-dimensional ALI (air–liquid interface) cultures**

Transwells containing 12 mm or 6.5 mm 0.4 µm polyester membrane inserts (Corning, CLS3460 or CLS3470) were coated with CellAdhere Type I Collagen (Stemcell, 07001) diluted once in distilled H<sub>2</sub>O and incubated at 37°C for 1–16 h, then washed with PBS.

Lung epithelial cells from healthy controls (bronchial [Lonza, CC-2540, normal human bronchial epithelial, NHBE] or small airway [Epithelix, EP61SA]) or patients with COPD (bronchial [Lonza, 195275, diseased human bronchial epithelial, DHBE] or small airway [Epithelix, EP66SA]) were grown in four T-175 flasks in EpiX Medium (Propagenix, 276-201) for bronchial cells or small airway epithelial cell growth medium (PromoCell, C-21070) for small airway epithelial cells (see tables 1 and 2). Once confluent, cells were frozen down at  $1 \times 10^6$  cells/vial at passage 2. Cells at passage 2 were plated in two T-75 flasks, grown until 80% confluent, and washed and detached using 6 mL trypsin (Lonza, CC-5034). The cell suspension was

May 2023

centrifuged at 1200 RPM for 5 min and cells were resuspended in PneumaCult ALI medium (Stemcell, 05001) for bronchial cells or PneumaCult ALI-S medium (Stemcell, 05050) for small airway cells at  $8 \times 10^5$  cells/mL; 0.5 mL and 0.25 mL were dispensed onto each 12 mm and 6.5 mm insert, respectively, and 1 mL or 0.5 mL of ALI medium were added into the space below the respective inserts. Cells were maintained in the appropriate ALI medium until a confluent monolayer was observed. Medium was then removed from the apical side and cells were differentiated for 3 weeks, with medium changed on the basal side every 2–3 days. Differentiation was confirmed by visually observing beating cilia and mucus production on the apical surface. After 3 weeks differentiation, ALI cultures were then incubated with the indicated agonists or antibodies for a further week during which time media and proteins were refreshed fully every 2–3 days. See table 3.

## **Recombinant protein production**

### ***Cloning and expression of IL-33***

cDNA molecules encoding the mature component of wild-type (WT) human IL-33 (aa 112–270), UniProt accession number 095760 (IL-33<sup>red</sup>), and a variant with all four cysteine residues mutated to serine (IL-33<sup>C>S</sup>, C208S, C227S, C232S and C259S) that is resistant to oxidation were synthesised by primer extension PCR and cloned into pJexpress 411 (DNA 2.0). WT IL-33 was considered to be in its reduced form (IL-33<sup>red</sup>) in 2x DPBS storage buffer before addition to culture medium. Sequences of both were modified to contain a 10x His, Avitag and Factor Xa protease cleavage site (MHHHHHHHHHHAAGLNDIFEAQKIEWHEAAIEGR) at the N-terminus. IL-33<sup>red</sup> (N-terminal tagged His10/Avitag; WT) and IL-33<sup>C>S</sup> (N-terminal tagged His10/Avitag; WT) were generated by transforming *Escherichia coli* BL21(DE3) cells, which were cultured in autoinduction medium (Overnight Express Autoinduction System 1, Merck Millipore, 71300-4) at 37°C for 18 h, harvested by centrifugation and stored at –20°C.

May 2023

Cells were resuspended in 2× DPBS containing complete EDTA-free protease inhibitor cocktail tablets (Roche, 11697498001) and 50 U/mL Benzonase nuclease (Merck Millipore, 70746-3), and lysed by sonication. Cell lysate was centrifuged at 50 000×g for 30 min at 4°C. IL-33 proteins were purified from the supernatant by immobilised metal affinity chromatography and further purified by size-exclusion chromatography (SEC) using a HiLoad 26/600 Superdex 75 pg column (GE Healthcare, 28989334). Peak fractions were analysed by SDS-PAGE. Fractions containing pure IL-33 were pooled and their concentrations determined by measuring absorbance at 280 nm. Final samples were analysed by SDS-PAGE. To generate untagged IL-33<sup>red</sup> or IL-33<sup>C>S</sup>, N-terminal tagged His10/Avitag IL-33 was incubated with 10 units of Factor Xa (GE Healthcare, 27084901) per mg of protein in 2× DPBS at room temperature for 1 h. Untagged IL-33 was purified using SEC on a HiLoad 16/600 Superdex 75 pg column (GE Healthcare, 28989333) with a flow rate of 1 mL/min.

### ***Generation and purification of IL-33<sup>ox</sup>***

IL-33<sup>red</sup> was oxidised by dilution to a final concentration of 0.5 mg/mL in 60% Iscove's Modified Dulbecco's Medium (IMDM) (with no phenol red) and 40% Dulbecco's Phosphate Buffered Saline (DPBS) and incubated at 37°C for 18 hours. Tags were cleaved from IL-33<sup>ox</sup> by incubation with Factor Xa (NEB, P8010L) at a final concentration of 1 µg/50 µg of IL-33<sup>ox</sup> for 120 min at 22°C. To deplete the sample of any remaining IL-33<sup>red</sup>, soluble human ST2 fused to human IgG1 Fc-His6 was incubated with the sample for 30 min at 22°C. The sample was concentrated and loaded on a HiLoad 26/600 Superdex 75 pg column (GE Healthcare, 28989334) at a flow rate of 2 mL/min. Each fraction containing pure IL-33<sup>ox</sup> was tested for its ability to activate EGFR (homogeneous time-resolved fluorescence [HTRF] assay in A549 cells and NHBE cells). Active fractions from batches were pooled and concentrated,

May 2023

and the final concentration of the sample was determined using UV absorbance spectroscopy at 280 nm. Final product quality was assessed by SDS-PAGE, high-performance SEC and reverse-phase HPLC. Additionally, liquid chromatography-mass spectrometry (LC-MS) was performed to confirm that IL-33<sup>ox</sup> was 4 daltons lighter than IL-33<sup>red</sup>. The efficiency of IL-33<sup>ox</sup> generation from recombinant IL-33 materials was 1.2–1.4%: 93.6 mg of initial WT IL-33 (batch no. CCH275) produced 1.13 mg of active IL-33<sup>ox</sup> (1.2%); 134.4 mg initial WT IL-33 (batch no. CCH276) produced 1.9 mg of active IL-33<sup>ox</sup> (1.4%).

### **CRISPR-Cas9 ablation of RAGE in A549 cells**

A mammalian plasmid was generated containing expression vectors for red fluorescent protein (RFP), guide RNA targeted to exon 3 of *AGER* (TGAGGGGATTTTCCGGTGC) and a Cas9 endonuclease. A549 cells cultured in Ham's F-12K Nutrient Mixture (Gibco, 11765054) with 10% FBS and 1% penicillin/streptomycin were seeded at a concentration of  $2 \times 10^5$  cells/mL in T-75 flasks. Cells were transfected with *AGER* guide RNA plasmid and polyethylenimine, linear 22  $\mu$ g (Polysciences, 23966-2). After a 2-day incubation following the transfection, RFP-positive cells were sorted using the FACS Aria Cell Sorter (BD) and loss of RAGE from A549 cells was confirmed by genomic PCR analysis.

### **Generation of ST2L-expressing A549 cells**

A549 cells were plated at a concentration of  $5 \times 10^5$  cells in a 12-well culture plate (Corning, 3513). Lentiviral particles containing ST2 (IL1RL1) (NM\_016232) Human Tagged ORF Clone were purchased from OriGene (RC217503L3V,  $4.1 \times 10^4$  TU/ $\mu$ L). Two wells of A549 cells (pool 1 and pool 2) were infected with the lentiviral particles in the presence of 1  $\mu$ g/mL polybrene (Sigma, H9268). After 4 h, the RPMI medium was refreshed and a further 24 h later the cells were switched to RPMI selection

May 2023

medium containing 0.5 µg/mL puromycin (Gibco, 12122530), and the cells were cultured for 48 h. Cells from pool 1 were used to generate A549 clones (1A2, 1B2 and 1B4).

### **Western blots and immunoprecipitation**

Submerged NHBE cells or bronchial epithelial ALI cultures were lysed in lysis buffer containing LDS sample buffer (Thermo, NP0008), 10 mM MgCl<sub>2</sub> (VWR, 7786-30-3), 2.5% β-mercaptoethanol (Sigma, M6250) and 0.4 µg/mL Benzonase (Millipore, 70746), and were heated to 95°C for 5 min. The samples and protein ladder (Bio-Rad, 1610374) were run on a 4–12% SDS-PAGE gel (Thermo, NW04127BOX) in MES running buffer (Thermo, B0002). Gels were transferred onto PVDF membranes (Bio-Rad, 1704156) using a Trans-Blot Turbo (Bio-Rad). Membranes were blocked and blotted with primary antibodies. Immunoreactive bands were developed using horseradish peroxidase (HRP)-conjugated secondary antibodies (table 4) and enhanced chemiluminescence substrate (Bio-Rad, 1705062), and visualised using a C-DiGit scanner (LI-COR Biosciences).

For immunoprecipitation, cells were lysed in 1× lysis buffer (Abcam, ab152163) supplemented with 1× phosphatase/protease inhibitor cocktail (Thermo, 78440), and the protein concentration was determined by a BCA assay (Thermo, 23225). NHBE protein extracts were incubated with anti-EGFR (R&D systems, AF231) at 4°C for 2.5 h. Protein A/G magnetic beads (Thermo, 88802) were added and mixed for 1 h. Beads were collected using a SureBeads Magnetic Rack (Bio-Rad, 1614916), washed, and proteins were released by treating with LDS sample buffer (Thermo, NP0008) and Sample Reducing Agent (Thermo, NP0004) at 95°C for 5 min. Membranes were incubated with the following primary antibodies: anti-EGFR, anti-RAGE and anti-IL-33.

### **Binding assay**

Streptavidin plates (Thermo Scientific, AB-1226) were coated with 10 µg/mL biotinylated antigen at room temperature for 1 h. Plates were washed and blocked with 1% BSA (Sigma, A9576) in PBS for 1 h, before 10 µg/mL RAGE-Fc (R&D Systems, 1145-RG) or ST2-Fc (R&D Systems, 523-ST) was added and the plates were incubated at room temperature for 1 h. EGFR-Fc (R&D Systems, 344-ER-050), 10 µg/mL in PBS, was added in the presence or absence of 10 µg/mL untagged RAGE (Sino Biological, 11629-HCCH) for 1 h. Following three washes with PBS, RAGE-Fc, ST2-Fc and EGFR-Fc were detected with 5.1 mg/mL anti-human IgG HRP (Sigma, AO170, dilution 1:10,000). Plates were washed and developed with TMB (Sigma, T0440). The reaction was quenched with 0.1 M H<sub>2</sub>SO<sub>4</sub>. Absorbance was read at 450 nm using Cytation Cell Imaging Gen5 software.

### **Immunohistochemistry 3-plex staining**

Bronchial epithelial ALI epithelial cultures were fixed in 10% formalin for 24 h and embedded in paraffin. Paraffin sections (4 µm) were mounted on positively charged slides and stained using the Ventana DISCOVERY ULTRA automated slide preparation system (Roche) with a sequential 3-plex chromogenic assay.

Antigen retrieval was achieved with the cell conditioner ULTRA CC1 (Roche, 5424569001) and endogenous peroxidase was blocked with DISCOVERY Inhibitor (Roche, 7017944001) for 12 min. For basal cell staining, anti-p63 (clone 4A4) (Roche, 790-4509: ready to use format) was applied for 24 min at 36°C and cells were visualised after 12 min of incubation with anti-mouse HQ (Roche, 7017782001) and anti-HQ HRP (Roche, 7017936001). Cells were incubated with the DISCOVERY Purple Kit (Roche, 07053983001) for 12 min.

Slides were exposed to an antibody denature step (92°C for 24 min) with ULTRA CC2 (Roche, 5424542001). For ciliated cell staining, anti-tubulin (Abcam, ab24610) was diluted in Antibody Diluent (Dako, S3022) to a final concentration of 0.05 µg/mL and was applied for 16 min. Staining was detected with mouse OmniMap anti-Ms HRP for 8 min (Roche, 5269652001) and visualised using the DISCOVERY Teal HRP Kit (Roche, 82544338001).

An additional antibody denaturation step was performed with CC2 before staining with a cocktail of 1.1 µg/mL rabbit anti-MUC5AC and 7 µg/mL rabbit anti-MUC5B (Abcam, ab198294 and ab87376, respectively), which was applied for 20 min. Cells were visualised after applying anti-rabbit NP (Roche, 7425317001) for 4 min, anti-NP-AP for 8 min (Roche, 7425325001) and then the DISCOVERY Yellow Kit (Roche, 7698445001) for 20 min.

Stained slides were counterstained with Hematoxylin II for 8 min (Roche, 5277965001) and bluing reagent for 4 min (Roche, 5266769001), rinsed with dishwashing detergent, dehydrated with a graded series of ethanol and xylene, and mounted with permanent mounting media.

Immunohistochemistry images were analysed in HALO v3.1 (Indica Labs); they were first annotated manually to exclude out of focus areas and regions of tissue damage. A random forest classifier was trained to recognise the epithelium and separate it from the transmembrane and glass slide background. For cilia area quantification, another random forest classifier was trained for coarse detection of tubulin staining, followed by fine detection using the Area Quantification v2.1.7 algorithm; this algorithm was also used for mucin area quantification. For basal (p63-positive) cell



May 2023

counting, the CytoNuclear 2.0.9 algorithm (Indica Labs) was used to segment cells based on nuclear staining; basal cells were further detected by counting p63-positive nuclei. All quantification methods were validated against human recognition and had more than 90% accuracy.

### **Multiplex immunofluorescence staining and analysis**

Bronchial epithelial ALI cultures from healthy and COPD donors were fixed in 10% neutral buffered formalin for 24 h and embedded in paraffin. Paraffin sections (4 µm) were mounted on positively charged slides and stained on the Leica BOND Rx platform with a multiplex immunofluorescence assay. Antigen retrieval was performed with BOND Epitope Retrieval Solution 1 (Leica, AR9961) for 20 min and endogenous peroxidase was blocked with Novocastra Peroxidase Block (Leica, RE7101) for 20 min.

Anti-MUC5AC (Thermo, MA1-21907) used at 0.0015 µg/mL in BOND primary antibody diluent (Leica, AR9352) was applied for 60 min at room temperature and visualised with a two-step polymer detection system: Polink-2 HRP polymer enhancer (10 min) and Polink-2 HRP polymer detector (10 min) (GBI, D41-110). This was followed by incubation with Opal 690 (Akoya Biosciences, FP1496A) diluted 1:200 in Plus Amplification buffer (Akoya Biosciences, FP1498) for 10 min.

The sections underwent an antibody denature step (95°C for 20 min) using BOND Epitope Retrieval Solution 1 (Leica, AR9961) and were incubated with anti-MUC5B (Abcam, ab87376) used at 0.025 µg/mL diluted in BOND primary antibody diluent (Leica, AR9352), for 30 min at room temperature. Detection was done using a two-step polymer detection system: Polink-2 HRP polymer enhancer (10 min) and Polink-2 HRP polymer detector (10 min) (GBI, D41-110). This was followed by incubation

May 2023

with Opal 570 (Akoya Biosciences, FP1488A) diluted 1:150 in Plus Amplification buffer (Akoya Biosciences, FP1498) for 10 min.

The sections underwent an additional antibody denaturation step with BOND Epitope Retrieval Solution 1 (Leica, AR9961) and were incubated with anti-E-cadherin (4A2) (CST, 14472) used at 0.25 µg/mL diluted in BOND primary antibody diluent (Leica, AR9352), for 30 min at room temperature. Detection was done using a two-step polymer detection system: Polink-2 HRP polymer enhancer (10 min) and Polink-2 HRP polymer detector (10 min) (GBI, D41-110). This was followed by incubation with Opal 520 (Akoya Biosciences, FP1487A) diluted 1:50 in Plus Amplification buffer (Akoya Biosciences, FP1498) for 10 min.

An additional antibody denaturation step with BOND Epitope Retrieval Solution 1 (Leica, AR9961) was performed for 20 min at 95°C. The slides were stained with DAPI (Akoya Biosciences, FP1490) diluted in BOND wash solution (Leica, AR9590) for 10 min at room temperature. Slides were then rinsed with deionised water and mounted with ProLong Diamond antifade mounting media (Thermo, P36965) before being scanned with Akoya Vectra Polaris.

Immunofluorescence images were analysed in Visiopharm software (version 2020.08). Out of focus and disrupted tissue areas were manually excluded from the image quantification pipeline. A Bayesian classifier was trained to outline the tissue areas from the background, and a convolutional neural network (DeepLabv3+) was trained to segment the mucin areas within the outlined tissue areas. Both models were trained via supervised learning and the segmentation results were validated against human recognition.

### **FACS analysis**

Following 7 days of treatment, 4-week-old healthy control or COPD bronchial epithelial ALI cultures on 6.5 mm inserts were analysed by flow cytometry. Then, 150  $\mu\text{L}$  trypsin (Lonza, CC-5034) was added to apical and basolateral compartments, and cultures were incubated for 30 min. ALI cultures were mechanically dissociated by gentle pipetting. The cell suspension was transferred to a U-shaped 96-well plate, and cells were counted and centrifuged at 1200 RPM at 4°C for 5 min.

Cells were stained with viability dye (Thermo, 65-0865-14, diluted 1:2,000), then 200  $\mu\text{L}$  of fixation and permeabilisation solution (Thermo, 00-5123 and 00-5223) were added and the cells were kept for 40 min on ice. Cells were centrifuged at 1200 RPM at 4°C for 5 min, resuspended in 300  $\mu\text{L}$  permeabilisation solution (Thermo, 00-8333) and seeded at  $5 \times 10^4$  cells/well. Cells were centrifuged again, resuspended in 50  $\mu\text{L}$  permeabilisation solution and stained for 30 min on ice with the following antibodies: anti-MUC5AC (Abcam, ab3649, 1:400), anti-MUC5B (Abcam, ab105460, 1:800), AF488 isotype (BioLegend, 400109, 1:400) and AF647 (BioLegend, 400130, 1:800). Anti-MUC5AC was coupled to AF488 (Abcam, ab236553) and anti-MUC5B was coupled to AF647 (Abcam, ab269823) using Lightning-Link kits (Abcam) according to the manufacturer's instructions. Data were acquired on a BD FACSymphony instrument and analysed using FlowJo software.

### **Phospho-ELISAs and proliferation assays**

A549 cells were seeded at  $5 \times 10^5$  cells/100  $\mu\text{L}$  for phospho-ELISAs or  $2 \times 10^3$  cells/100  $\mu\text{L}$  for proliferation assays in 96-well plates. Following incubation at 37°C for 18–24 h, cells were washed twice and serum starved for 18–24 h. Cells were incubated with indicated antibodies for 30 min and then with indicated agonists for 10 min before lysis and detection according to the manufacturer's instructions (phospho-

May 2023

ELISAs: p-ERK1/2 [Thermo, 85-86012-11], p-STAT5 [Thermo, 85-86112-11];  
proliferation: CellTiter-Glo 2.0 cell viability assay [Promega, G9242]).

### **IL-6 ELISA**

A549 cells or HUVECs were seeded at  $5 \times 10^5$  cells/100  $\mu$ L in 96-well plates. Cells were incubated with indicated antibodies for 30 min and then with indicated agonists for 20 h (table 5). Supernatants were analysed for IL-6 release using a Duoset ELISA (R&D Systems, DY206) according to the manufacturer's protocol.

### **MUC5AC ELISA**

Mucin5AC ELISAs were purchased from Novus Biologicals (NBP2-76703). Apical supernatants were collected from ALI cultures following a 30 min incubation at 37°C with 0.2 mL PBS in the apical region per 24-well transwell culture. Apical washes were diluted 1:200 with kit diluent and the ELISA was performed according to manufactures instructions.

### **Phosphorylation arrays**

MAP kinase phosphorylation antibody array kits (Abcam, ab211061) and RTK phosphorylation antibody array kits (Abcam, ab193662) were used according to the manufacturer's instructions. Briefly, submerged NHBE cells plated in a 6-well dish were serum starved for 18–24 h, treated with 30 ng/mL of IL-33<sup>red</sup>, IL-33<sup>C>S</sup>, IL-33<sup>ox</sup> or EGF, or left untreated, and incubated at 37°C for 10 min. Cells were washed and supplemented with lysis buffer. Protein extracts were centrifuged at 14 000 RPM at 4°C, and protein concentrations were determined using the BCA protein assay (Thermo, 23225), for which 250  $\mu$ g of total protein was used per array membrane. Membranes were visualised using a LI-COR C-DiGit scanner and quantified using Image Studio Lite software.

### **HTRF assay**

Submerged NHBE cells or A549 cells were plated at  $5 \times 10^5$  cells/100  $\mu$ L in a 96-well plate, incubated at 37°C for 18–24 h, then washed with PBS and serum starved for a further 18–24 h. Cells were stimulated with increasing concentrations of ligands before being returned to 37°C for 10 min. Cells were lysed using 50  $\mu$ L of lysis buffer, then the assay was carried out according to the manufacturer's instructions (HTRF kit; Cisbio, 64EG1PEH). Time-resolved fluorescence was read at 620 nm and 665 nm using an EnVision plate reader (Perkin Elmer), and data were analysed by calculating the 665:620 nm ratio.  $EC_{50}$ s were determined by curve fitting using a four-parameter logistic equation in GraphPad Prism software.

### **qPCR**

Following 7 days of treatment, 4-week-old healthy or COPD ALI (bronchial or small airway epithelial) cultures on 6.5 mm inserts were lysed for RNA analysis. Each ALI apical surface was incubated at 37°C for 30 min with 200  $\mu$ L PBS. Direct-zol RNA Miniprep kits (Zymo Research, R2050) were used for RNA extraction. For submerged cultures (A549 cells, HUVECs and NHBE cells), the RNeasy Mini Kit (Qiagen, 74104) was used. cDNA was synthesised using the High-Capacity RNA-to-cDNA Kit (Thermo, 4388950).

For RT-qPCR, 4  $\mu$ L cDNA, 5  $\mu$ L TaqMan Fast Advanced Master Mix (Thermo, 4444557), 0.5  $\mu$ L MUC5AC FAM probe (Thermo, Hs01365616\_m1) or MUC2 (Thermo, Hs00894041\_g1) or CST1 (Thermo, Hs00606961\_m1) or ST2 long (Thermo, Hs00249389\_m1) or ST2 short (Thermo, Hs01073297\_m1), and 0.5  $\mu$ L GAPDH VIC probe (Thermo, Hs02786624\_g1) were added to a MicroAmp EnduraPlate (Thermo, 4483273). Plates were sealed and briefly centrifuged before

May 2023

analysis using a QuantStudio 7 Flex Real-Time PCR system (Thermo).  $\Delta\Delta CT$  was calculated by normalising data to an untreated control.

### **Bulk RNA sequencing**

RNA extracted from bronchial epithelial ALI cultures was processed externally by Source BioScience (Cambridge, UK). The library was prepared using the Illumina mRNA stranded kit. Sequencing was performed on an Illumina NovaSeq 6000 System to generate 30M 150-base-pair paired-end reads. RNA libraries were prepared in accordance with the NEBNext Ultra II Directional RNA Sample Preparation Protocol for Illumina Paired-End Multiplexed Sequencing.

Sequenced libraries were checked for quality using MultiQC [1] based on STAR [2] alignment against the GRCh38 ensembl (v100) human genome. Adapter trimming was performed using NGmerge [3], and Salmon [4] was used for gene expression quantification using GRCh38 ensembl (v100) as a reference. The bioinformatics workflow was organised using Nextflow [5] and Bioconda software management tools [6]. Differential expression analysis was performed in R using the DESeq2 [7] package with “apeglm”[8] fold change shrinkage. The Benjamini–Hochberg method was used for multiple correction of p-values [9]. Volcano plots showing the fold change and q-value were created using Spotfire (TIBCO) data analysis software. Gene Set Variation Analysis (GSVA) [10] was used to calculate samplewise gene set enrichment scores for the generated signatures in public COPD patient gene expression data sets GSE37147 [11], GSE11784 [12] and GSE47460 [13]. Calculations were performed using the GSVA package in R. Patient groups were compared according to disease and smoking status for gene sets GSE37147 and GSE11784, and according to COPD severity by GOLD stage for GSE47460. Significance was calculated using one-way ANOVA, followed by *post hoc* pairwise

May 2023

comparisons with Tukey's honest significant difference test conducted in Prism 9 (GraphPad). Linear regression of GSVA enrichment scores versus predicted FEV<sub>1</sub> (%) from patients with COPD in GSE47460 was performed using TBCO Spotfire.

### **Single-cell RNA sequencing**

Single-cell suspensions of bronchial epithelial ALI cultures were generated as described in the FACS analysis section, washed twice with PBS/0.04% BSA and resuspended at 900 cells/ $\mu$ L. Cells were mixed with reagents from Chromium Next GEM Single Cell 3' GEM Kit v3.1 (10x Genomics, 1000123), as per the manufacturer's instructions. Both the sample mix and capture beads from Chromium Next GEM Single Cell 3' Gel Bead Kit v3.1 (10x Genomics, 1000122) were loaded onto the microfluidic chip – Chromium Next GEM Chip G (10x Genomics, 2000177) – aiming to capture 8000 cells per sample. The chip was run on a Chromium Single Cell Controller (10x Genomics, GCG-SR-1) for single-cell partitioning and barcoding, and cDNA was prepared from the barcoded cells using Chromium Next GEM Single Cell 3' GEM Kit v3.1 (10x Genomics, 1000123). Data were aligned to GRCh38-3.0.0 human reference genome using Cell Ranger v3.0.1 (10x Genomics). A quality control check of cDNA was performed using NGS high sensitivity assay (Agilent Technologies, DNF-474-0500) on Fragment analyzer (Agilent Technologies). Single cell libraries were prepared using Chromium Next GEM Single Cell 3' Library Kit v3.1 (10x Genomics, 1000157), as per manufacturer's guidelines. QC was performed on the libraries using NGS high sensitivity assay (Agilent Technologies, DNF-474-0500) on Fragment analyzer (Agilent Technologies) and dsDNA HS assay (Invitrogen, Q32851) on Qubit fluorometer (Invitrogen). Appropriately diluted and pooled libraries were loaded for sequencing on Novaseq (Illumina), on 3 flow cells, 2x NovaSeq 6000 S1 Reagent Kit, 100 cycles (Illumina, 20028319) and 1x NovaSeq 6000 S2 Reagent Kit, 100 cycles (Illumina, 20028316), as per 10x Genomics recommendations for

sequencing read, type and depth. Normalisation and downstream analyses were performed using the Seurat v3.2.3 [14] package in R v3.6.3. Raw counts were normalised and scaled using the Seurat functions *NormalizeData* and *ScaleData* (default parameters). Uniform Manifold Approximation and Projection (UMAP) dimensionality reduction was obtained by applying Seurat's *RunUMAP* function considering the top 2000 most variable genes, and the 25 first principal components (PCAs) were obtained using Seurat's *RunPCA* function. For the healthy donor (n=3), cell clustering was performed by applying Seurat's functions *FindNeighbors* and *FindClusters*. A resolution of 0.5 was applied, as this refined a cluster containing goblet cell identity. Clusters that showed high proximity in the phylogenetic tree obtained using *BuildClusterTree* were merged. Cell cluster markers were obtained with Seurat's *FindAllMarkers* function (non-parametric Wilcoxon rank sum test) and used for cluster annotation. Cell types were annotated manually based on the highly expressed genes for each cluster and known epithelial airway cell markers (supplementary figure S5 and supplementary table S1) [15-19]. Data from COPD donors were analysed separately (n=3), using the same functions applied for the health donors. Clustering was performed with Seurat's resolution 0.6, merging clusters with high similarity. The healthy donor was used as the reference to project cell annotations onto the COPD donors (n=3) with Seurat's *TransferData* function and comparing markers between datasets. All differential gene expression analyses between distinct treatments were performed using non-parametric Wilcoxon rank sum tests using the Seurat functions *FindMarkers* and *FindAllMarkers*. Genes considered to be differentially expressed showed log-fold change cut-offs of 0.5 and adjusted p-values for multiple testing below 0.001 (Bonferroni correction).



May 2023

### **Mass spectrometry**

Anti-EGFR antibodies, 100 µg (R&D systems, AF231), were incubated with 40 mg Dynabeads (Thermo, 14311D), covalently coupled according to the manufacturer's instructions, then resuspended in PBS at 30 mg/mL and stored at 4°C.

Submerged NHBE cells (Lonza, CC-2540) were seeded at  $1 \times 10^6$  cells/15 cm dish (Thermo, 157150) and maintained in complete BEGM (Lonza, CC-3171) for 30 days with a change of medium every 3 days until confluent. Cells were then washed twice with PBS and serum starved at 37°C for 18–24 h.

Cells were treated with medium alone (unstimulated control), 30 ng/mL IL-33<sup>red</sup>, 30 ng/mL IL-33<sup>ox</sup> or 30 ng/mL EGF, before being incubated at 37°C for 10 min, then washed twice in ice-cold PBS and lysed with 1 mL lysis buffer per dish (Abcam, ab152163) containing phosphatase and protease inhibitors (Thermo, 78440). Cells were scraped into lysis buffer and centrifuged at 14 000 RPM at 4°C. Protein concentration was determined using a BCA assay kit (Thermo, 23225) and protein extracts were normalised to 3 mg/mL with lysis buffer. Total protein extract of 6 mg was incubated with 100 µL anti-EGFR Dynabeads (described above) and mixed at 4°C for 5 h. Dynabeads were immobilised using a SureBeads Magnetic Rack (Bio-Rad, 1614916). Protein extract was washed five times with 50 mM Tris-HCl pH 7.5, 0.5% Triton X-100, 0.3 M NaCl. Beads were washed 10 times with a different wash buffer (50 mM Tris-HCl pH 7.5). RapiGest 1% (w/v) (Waters, 186001861) in 50 mM Tris-HCl pH 8.0 was added to the beads and these were heated at 60°C for 10 min. The supernatant was collected and 100 µL 50 mM Tris-HCl pH 8.0 was added to the resin and mixed before it was combined with the first elution. TCEP (Sigma, 646547) was added to yield a final concentration of 5 mM, and the sample was heated at 60°C for 10 min.

Eluates were alkylated by the addition of iodoacetamide (Sigma, 16125) to 10 mM in the dark at room temperature for 20 min. Alkylation was quenched by the addition of DTT (Sigma, D5545) to 10 mM. Tris-HCl 50 mM pH 8.0 was added to give a final sample volume of 500  $\mu$ L. Trypsin (Promega, V5111), 0.5  $\mu$ g, was added and samples were digested at 30°C overnight on a shaking platform at 400 RPM. Samples were acidified with trifluoroacetic acid (Sigma, 302031) to a final concentration of 2.0% (v/v) and incubated at 37°C for 1 h. Samples were centrifuged at 14 000 RPM for 30 min and the supernatant was collected. Samples were processed through C18 columns (Thermo, 87784) according to the manufacturer's instructions and dried using a speed-vac before being stored at -20°C. Samples were analysed by peptide mass fingerprinting mass spectrometry with scaffold software at the Medical Research Council Protein Phosphorylation and Ubiquitylation Unit, University of Dundee, UK.

### **NF- $\kappa$ B translocation**

Cells were plated into 96-well plates at  $1 \times 10^4$  cells/well and incubated with the indicated antibodies for 30 min before indicated agonists were added for another 30 min. Cells were fixed with 10% neutral buffered formalin (Sigma, HT5011), permeabilised with PBS/0.1% Triton X-100 and stained with NF- $\kappa$ B p65 (Thermo, PA5-16545), anti-rabbit AF488 (Invitrogen, 35552) and Hoechst 33342 dye (Thermo, 62249). Plates were analysed for nuclear NF- $\kappa$ B p65 translocation using a Cytation 5.

### **Immunohistochemistry 1-plex staining**

Paraffin sections (3  $\mu$ m) were mounted on FLEX IHC microscope slides (Dako, K8020, Agilent) and subjected to heat-induced epitope retrieval in a PT Link pre-

treatment module (Dako, Agilent) in Tris/EDTA (pH 9) before immunohistochemical staining. Tissue sections were blocked with EnVision FLEX peroxidase blocking reagent (Dako, Agilent), incubated with 2.5 µg/mL mouse anti-human IL-33 antibody (Enzo Life Sciences, ALX-804-840-C100) for 60 min at room temperature, and incubated with goat anti-mouse secondary antibodies conjugated to an HRP-conjugated polymer (EnVision FLEX, Agilent) and diaminobenzidine for visualisation. Nuclei were counterstained with Mayer's hematoxylin. Sections were dehydrated through ethanol series, cleared in xylene and mounted with Pertex (HistoLab). Stained slides were digitised using an Olympus VS200 SLIDEVIEW scanner.

### ***In situ* hybridisation 1-plex and 2-plex staining**

Target mRNA was visualised using the RNAscope 2.5 FFPE Red Assay Kit (Advanced Cell Diagnostics) according to the manufacturer's instructions. Briefly, paraffin sections were deparaffinised through a series of alcohol and xylene baths, incubated with endogenous enzyme block for 10 min, boiled in target retrieval solution for 15 min and treated with protease for 15 min, followed by target probe hybridisation for IL-33, EGFR and IL-33 or EGFR and RAGE (Hs-IL-33, 400111; Hs-EGFR, 310061-C2; Hs-AGER, 470121). The bacterial gene *DapB* (310043) was used as a negative control probe. For 1-plex staining, the housekeeping gene *PPIB* (Hs-PPIB, 313901) was used as a positive control probe, and for 2-plex staining, *PPIB* and *POLR2a* (2-plex positive-Hs, 321641) were used as positive control probes. Target mRNA was amplified and visualised (1-plex: red chromogen; 2-plex: red [EGFR] and green [IL-33 and RAGE] chromogen). Nuclei were detected with hematoxylin. Finally, tissue sections were dehydrated and mounted under glass coverslips using Pertex (Histo lab). Stained slides were digitalised using an Olympus VS200 SLIDEVIEW scanner.

### **Statistical analysis**

Statistical analyses were conducted using R (v.4.0.2; Vienna, Austria) or Prism 9 (GraphPad Software, San Diego, CA, USA). Data are presented as mean with standard error of the mean. A non-parametric Kruskal–Wallis test with multiple comparisons was used for comparisons between more than two groups, unless otherwise indicated. A significance threshold of 0.05 was used for  $p$  values. All experiments are represented by several biological replicates or independent experiments, unless otherwise mentioned. Box plots were generated using the following parameters: horizontal black lines with each box present median values; boxes extend from 25th to 75th percentiles of values; whiskers extend to a maximum of 1.5x the interquartile range (75th percentile–25th percentile) beyond the boxes; lowest dots are minimum values and highest dots are maximum values for each box. All experiments are represented by several biological replicates or independent experiments, unless otherwise mentioned. The number of replicates per experiment is indicated in the legends. The quantitative Venn diagram of mass spectrometry data was created using the *Bioinformatics & Evolutionary Genomics* web tool ([https://bioinformatics.psb.ugent.be/cgi-bin/liste/Venn/calculate\\_venn.html](https://bioinformatics.psb.ugent.be/cgi-bin/liste/Venn/calculate_venn.html)). All western blots, co-immunoprecipitation experiments, FACS analyses, ELISAs and RT-qPCRs were independently replicated at least twice with similar results. No statistical methods were used to predetermine sample size.

## Methods tables

**Table 1 Human bronchial epithelial cells purchased from Lonza**

| Cells     | Lonza catalogue number | ID         | Pathology | Smoking history | Medication related to airway disease |
|-----------|------------------------|------------|-----------|-----------------|--------------------------------------|
| COPD DHBE | 195275                 | 630389     | COPD      | Yes             | Unknown                              |
| COPD DHBE | 195275                 | 32336      | COPD      | Yes             | Albuterol                            |
| COPD DHBE | 195275                 | 430905     | COPD      | Yes             | Unknown                              |
| COPD DHBE | 195275                 | 18TL095116 | COPD      | Yes             | Unknown                              |
| COPD DHBE | 195275                 | 362792     | COPD      | Yes             | Unknown                              |
| COPD DHBE | 195275                 | 409276     | COPD      | Yes             | Inhaler and oxygen                   |
| COPD DHBE | 195275                 | 415058     | COPD      | Yes             | Unknown                              |
| COPD DHBE | 195275                 | 636518     | COPD      | Yes             | Albuterol,<br>Prednisone,<br>Mucinex |
| COPD DHBE | 195275                 | 239784     | COPD      | Yes             | Unknown                              |
| COPD DHBE | 195275                 | 436083     | COPD      | Yes             | Spiriva & Ventolin                   |
| NHBE      | CC-2540                | 630564     | Healthy   | No              | N/A                                  |
| NHBE      | CC-2540                | 633427     | Healthy   | No              | N/A                                  |
| NHBE      | CC-2540                | 543643     | Healthy   | No              | N/A                                  |
| NHBE      | CC-2540                | 608196     | Healthy   | No              | N/A                                  |
| NHBE      | CC-2540                | 628080     | Healthy   | No              | N/A                                  |
| NHBE      | CC-2540                | 543643     | Healthy   | No              | N/A                                  |
| NHBE      | CC-2540                | 18TL012118 | Healthy   | No              | N/A                                  |
| NHBE      | CC-2540                | 382850     | Healthy   | No              | N/A                                  |

May 2023

|      |         |        |         |    |     |
|------|---------|--------|---------|----|-----|
| NHBE | CC-2540 | 501936 | Healthy | No | N/A |
|------|---------|--------|---------|----|-----|

**Table 2 Human small airway epithelial cells purchased from Epithelix**

| ID       | Pathology | Smoking history |
|----------|-----------|-----------------|
| SA069301 | Healthy   | No              |
| SA068001 | Healthy   | No              |
| SA067101 | Healthy   | No              |
| SA037201 | Healthy   | No              |
| SA070202 | COPD      | No              |
| SA066802 | COPD      | Yes             |
| SA066702 | COPD      | Yes             |
| SA062502 | COPD      | Yes             |

**Table 3 Antibodies/binding proteins used in cell culture assays**

| Antibody/protein         | Identifier        | Host species | Supplier    |
|--------------------------|-------------------|--------------|-------------|
| hIgG1                    | NIP228_ SP14-266  | Human        | AstraZeneca |
| Tozorakimab (anti-IL-33) | SP15-124          | Human        | AstraZeneca |
| gIgG1                    | AB-108-C          | Goat         | R&D systems |
| mIgG1                    | mNIP228_ SP14-108 | Mouse        | AstraZeneca |
| Anti-ST2                 | Ab1440361         | Mouse        | AstraZeneca |
| Anti-RAGE                | M4F4              | Mouse        | AstraZeneca |
| Anti-EGFR                | LA1, 05-101       | Mouse        | Millipore   |
| Anti-ST2                 | AF523             | Goat         | R&D Systems |
| Anti-IL-4R               | MAB230            | Mouse        | R&D Systems |
| Anti-IL-13               | MAB213            | Mouse        | R&D Systems |
| Anti-EGF                 | MAB236            | Mouse        | R&D Systems |
| RAGE-FC protein          | 1145-RG           | Human        | R&D Systems |
| sST2 protein             | 523-ST            | Human        | R&D Systems |



**Table 4 Secondary antibodies used in western blots and immunoprecipitation assays**

| Epitope        | Company                      | Cat. # | Dilution |
|----------------|------------------------------|--------|----------|
| EGFR           | Cell Signaling<br>Technology | 4267   | 1:1000   |
| p-EGFR Y1068   | Cell Signaling<br>Technology | 3777   | 1:1000   |
| p-EGFR Y1173   | Cell Signaling<br>Technology | 4407   | 1:1000   |
| p-EGFR Y845    | Cell Signaling<br>Technology | 6963   | 1:1000   |
| p-EGFR Y992    | Cell Signaling<br>Technology | 2235   | 1:1000   |
| p-PLC $\gamma$ | Cell Signaling<br>Technology | 14008  | 1:1000   |
| p-AKT S473     | Cell Signaling<br>Technology | 4060   | 1:1000   |
| p-STAT5        | Cell Signaling<br>Technology | 9314   | 1:1000   |
| p-JNK1/2       | Cell Signaling<br>Technology | 4668   | 1:1000   |
| p-ERK1/2       | Cell Signaling<br>Technology | 4370   | 1:1000   |
| p-p38 MAPK     | Cell Signaling<br>Technology | 9211   | 1:1000   |

|                              |                              |        |          |
|------------------------------|------------------------------|--------|----------|
| P38 MAPK                     | Cell Signaling<br>Technology | 9212   | 1:1000   |
| IRAK1                        | Cell Signaling<br>Technology | 4504   | 1:1000   |
| p-NF- $\kappa$ B (p105)      | Cell Signaling<br>Technology | 4806   | 1:1000   |
| GAPDH                        | Cell Signaling<br>Technology | 5174   | 1:1000   |
| RAGE                         | Cell Signaling<br>Technology | 6996   | 1:1000   |
| Anti-rabbit HRP<br>secondary | Cell Signaling<br>Technology | 7074   | 1:10 000 |
| IL-33                        | R&D Systems                  | AF3625 | 1:1000   |
| ST2                          | R&D Systems                  | AF523  | 1:1000   |
| Anti-goat HRP<br>secondary   | R&D Systems                  | HAF017 | 1:10 000 |

**Table 5 Agonists used in ELISAs**

| Agonist                                                                                                                                                                                                                      | Supplier    | Identifier              | Concentration used in experiments unless stated otherwise (ng/mL) |
|------------------------------------------------------------------------------------------------------------------------------------------------------------------------------------------------------------------------------|-------------|-------------------------|-------------------------------------------------------------------|
| IL-33 <sup>ox</sup> (wild-type form that has been oxidised causing the formation of two disulphide bonds between four cysteine residues)                                                                                     | AstraZeneca | RD15, CCH275 and CCH276 | 30                                                                |
| IL-33 <sup>C&gt;S</sup> (a mutant form of IL-33 in which all four cysteines (C208, C227, C232 and C259) have been mutated to serine, preventing the formation of disulphide bonds and making it more resistant to oxidation) | AstraZeneca | 11/12/2015              | 30                                                                |
| IL-33 <sup>red</sup> (wild-type form of IL-33 in a reduced state that does not contain disulphide bonds)                                                                                                                     | AstraZeneca | 07/24/2015              | 30                                                                |
| EGF                                                                                                                                                                                                                          | R&D Systems | 236-EG-200              | 30                                                                |
| TGF $\alpha$                                                                                                                                                                                                                 | R&D Systems | 239-A-100               | Titration                                                         |
| HB-EGF                                                                                                                                                                                                                       | R&D Systems | 259-HE-050/CF           | Titration                                                         |

|                     |                |                    |           |
|---------------------|----------------|--------------------|-----------|
| Amphiregulin (AREG) | R&D<br>Systems | 262-AR-<br>100/CF  | Titration |
| Betacellulin/BTC    | R&D<br>Systems | 261-CE-<br>010/CF  | Titration |
| Epiregulin          | R&D<br>Systems | 1195-EP-<br>025/CF | Titration |
| Epigen              | R&D<br>Systems | 6629-EP-<br>025/CF | Titration |
| HMGB1               | R&D<br>Systems | 1690-HMB-050       | Titration |
| S100A8/A9           | R&D<br>Systems | 8226-S8-050        | Titration |
| S100A12             | R&D<br>Systems | 1052-ER-050        | Titration |
| S100B               | R&D<br>Systems | 1820-SB-050        | Titration |
| IL-13               | R&D<br>Systems | 213-ILB            | 10        |

## Supplementary tables and figures

### Supplementary table S1 Mass spectrometric analysis showing immunoprecipitation of EGFR in the presence of IL-33<sup>ox</sup>

| Protein  | Size    | IL-33 <sup>red</sup>                | IL-33 <sup>ox</sup>                 | EGF                                 |
|----------|---------|-------------------------------------|-------------------------------------|-------------------------------------|
|          |         | Total Unique Peptide Count<br>n = 3 | Total Unique Peptide Count<br>n = 3 | Total Unique Peptide Count<br>n = 3 |
| AP2A1    | 108 kDa | 0                                   | 20                                  | 14                                  |
| AP2A2    | 104 kDa | 0                                   | 16                                  | 10                                  |
| SHC1     | 63 kDa  | 0                                   | 15                                  | 17                                  |
| SHC1     | 63 kDa  | 0                                   | 15                                  | 17                                  |
| AP2B1    | 105 kDa | 0                                   | 15                                  | 16                                  |
| AP2B1    | 105 kDa | 0                                   | 14                                  | 16                                  |
| IL33     | 31 kDa  | 0                                   | 11                                  | 0                                   |
| AGER     | 43 kDa  | 0                                   | 11                                  | 0                                   |
| AP2M1    | 50 kDa  | 0                                   | 10                                  | 11                                  |
| FASN     | 273 kDa | 0                                   | 8                                   | 3                                   |
| AP1B1    | 105 kDa | 0                                   | 7                                   | 7                                   |
| FARSA    | 58 kDa  | 0                                   | 6                                   | 5                                   |
| ATAD3B   | 73 kDa  | 0                                   | 5                                   | 8                                   |
| AP2S1    | 17 kDa  | 0                                   | 5                                   | 4                                   |
| CBLB     | 109 kDa | 0                                   | 5                                   | 4                                   |
| EPN1     | 60 kDa  | 0                                   | 5                                   | 3                                   |
| EPN1     | 60 kDa  | 0                                   | 5                                   | 3                                   |
| GSN      | 86 kDa  | 0                                   | 5                                   | 3                                   |
| TGFBI    | 75 kDa  | 0                                   | 4                                   | 6                                   |
| TNC      | 241 kDa | 0                                   | 4                                   | 4                                   |
| MMP14    | 66 kDa  | 0                                   | 4                                   | 0                                   |
| EPHB1    | 110 kDa | 0                                   | 3                                   | 0                                   |
| ATP1A2   | 112 kDa | 0                                   | 3                                   | 0                                   |
| ATP6V0A  | 96 kDa  | 0                                   | 3                                   | 10                                  |
| ATP6V1A  | 68 kDa  | 0                                   | 3                                   | 4                                   |
| HIST1H4A | 11 kDa  | 0                                   | 3                                   | 0                                   |
| MFGE8    | 43 kDa  | 0                                   | 3                                   | 3                                   |
| RPLP2    | 12 kDa  | 0                                   | 3                                   | 0                                   |
| 37500    | 41 kDa  | 0                                   | 3                                   | 0                                   |
| LMO7     | 193 kDa | 0                                   | 3                                   | 5                                   |
| ATP6V0D  | 40 kDa  | 0                                   | 3                                   | 5                                   |
| SDCBP    | 32 kDa  | 0                                   | 3                                   | 0                                   |
| ITGA6    | 127 kDa | 0                                   | 3                                   | 7                                   |
| SOS2     | 153 kDa | 0                                   | 3                                   | 2                                   |
| TNK2     | 115 kDa | 0                                   | 0                                   | 4                                   |
| EXPH5    | 223 kDa | 0                                   | 0                                   | 3                                   |
| SVIL     | 248 kDa | 0                                   | 0                                   | 3                                   |
| APOD     | 21 kDa  | 6                                   | 0                                   | 0                                   |
| PCBP2    | 39 kDa  | 3                                   | 0                                   | 0                                   |
| RPN2     | 69 kDa  | 3                                   | 0                                   | 0                                   |
| ALDH1B1  | 57 kDa  | 3                                   | 0                                   | 0                                   |
| OS9      | 76 kDa  | 3                                   | 0                                   | 0                                   |
| TPM4     | 29 kDa  | 3                                   | 0                                   | 0                                   |

**Supplementary table S2 Selected genes upregulated by IL-33<sup>ox</sup> in ALI cultures**

| Function                            | Protein                     | Upregulated genes              |
|-------------------------------------|-----------------------------|--------------------------------|
| Extracellular matrix remodelling    | Serine protease             | CTSC1, PCSK6                   |
|                                     | Serine protease inhibitors  | SERPINS2-10-4-1                |
|                                     | Metalloproteinases          | ADAM8                          |
|                                     | Cysteine protease inhibitor | CST1, FETUB                    |
| Goblet cell differentiation         | Goblet cells                | KLF4, SOX2, SPDEF              |
|                                     | Lipoxygenase                | ALOX15                         |
| Carbohydrate biosynthesis machinery | Glycosyltransferase         | MGAT3, ABO, ST6GAL1, ST3GAL4   |
|                                     | Fucosyl transferases        | FUT3                           |
|                                     | Hyaluronidase               | HYAL1                          |
|                                     | Mucin glycosylation         | GALNT4, GALNT6, GCNT3, B3GNT6  |
|                                     | Sugar metabolism            | FBP1, UAP1, HS3ST1, FETUB, GNE |
| Components of secretory process     | Mitochondrial organisation  | MARK2, NDA                     |
|                                     | ATP                         | ATP6V0C, EP300                 |

|  |                                                                  |             |
|--|------------------------------------------------------------------|-------------|
|  | Endoplasmic<br>reticulum/Golgi vesicle<br>transport organisation | RAP1A       |
|  | Cellular stress                                                  | SIRT7, YBX1 |

Genes were selected for inclusion based on a twofold change in expression, adjusted p-value <0.05, treatment and direction.

**Supplementary table S3 Fifteen cell states identified in healthy bronchial epithelial ALI cultures representing cell heterogeneity observed *in vivo* [15-19]**

| Cell types                                 | Cell states                                   | Gene marker                                           |
|--------------------------------------------|-----------------------------------------------|-------------------------------------------------------|
| Basal cells                                | Basal                                         | KRT5+/KRT15+/TP63+/BCAM+/COL17A1+ /KRT14+             |
|                                            | Basal cycling                                 | KRT5+/MKI67+/TOP2A+/CENPF+                            |
|                                            | Suprabasal 1                                  | KRT5+ / KRT13+ / SERPINB4+ / KRT6A+ / SPRR1B+         |
|                                            | Suprabasal 2                                  | SPRR2D+ / FN1+ / S100A8+ / SPRR1B+ /KRT16+            |
|                                            | Suprabasal 3                                  | KRT4+ / SERPINB3+ / SERPINB1 + / CSTA+ / TXN+ / HES1+ |
| Transition (Basal to differentiated cells) | Transition 1                                  | KRT4+ (low) / SCGB3A1+ (low) /CTNNB1+ / LRRC75A+      |
|                                            | Transition 2                                  | KRT4+ (low) / SCGB3A1+ (low) / HES4+ / MUC4+          |
| Secretory cells                            | Club 1                                        | CXCL5+ / CXCL6+ / LCN2+ / SAA1+ / SAA2+ / TNIP3+      |
|                                            | Club 2                                        | SCGB1A1+/SCGB3A1+/BPIFA1+/BPIFB1+ /MSMB+              |
|                                            | Goblet                                        | MUC5AC+/TFF3+/SPDEF+/S100P+/AQP5+                     |
| Ciliated cells                             | Deuterosomal 1 (intermediate ciliated cell 1) | CDC20B+/E2F7+/PLK4+/HES6+/CCNO+                       |



|                 |                                                  |                                                    |
|-----------------|--------------------------------------------------|----------------------------------------------------|
|                 | Deuterosomal 2<br>(intermediate ciliated cell 2) | DEUP1+/CCNO+/SISHA8+/MUC12+/RIBC2+                 |
|                 | Ciliated 1                                       | PIFO+/DNAH5+/RSPH1+/<br>C20orf85+/TUBA1A+/TMEM190+ |
| Rare cell types | Ionocytes/tuft cells                             | CFTR+ / FOXI1+ / TMPRSS11E+ /<br>TMEM16A+          |
|                 | Neuroendocrine                                   | ASCL1+/CALCA+/CHGA+/HOXB2+                         |
|                 | (pulmonary neuroendocrine cells)                 |                                                    |

**Supplementary table S4 Gene signatures: 249 upregulated by IL-33<sup>ox</sup> and 135 downregulated by inhibition of IL-33**

| Genes downregulated by anti-IL33 (tozorakimab) treatment in COPD ALI. NGS adjusted p-value (BH FDR) < 0.05 >2 Fold Change | Genes upregulated by IL-33 <sup>ox</sup> treatment in ALI NGS adjusted p-value (BH FDR) <0.05 >2 Fold Change |
|---------------------------------------------------------------------------------------------------------------------------|--------------------------------------------------------------------------------------------------------------|
| ITLN1                                                                                                                     | CISH                                                                                                         |
| NOS2                                                                                                                      | SERPINB10                                                                                                    |
| CST1                                                                                                                      | SH2D1B                                                                                                       |
| CEACAM5                                                                                                                   | NEK6                                                                                                         |
| PRB1                                                                                                                      | CD55                                                                                                         |
| FCGBP                                                                                                                     | ITLN1                                                                                                        |
| PRB2                                                                                                                      | CCL26                                                                                                        |
| B3GNT6                                                                                                                    | FETUB                                                                                                        |
| TSPAN8                                                                                                                    | SERPINB2                                                                                                     |

|            |            |
|------------|------------|
| TFF3       | LRRC8D     |
| AC111149.2 | CST1       |
| SERPINB10  | SLC6A14    |
| LYZ        | USP54      |
| HMGCS2     | B3GNT6     |
| ALPL       | SOCS1      |
| FOLH1      | CMYA5      |
| ADRA2A     | AC090004.2 |
| PIK3C2G    | VSIG1      |
| GOLGA7B    | ANO1       |
| VSIG2      | GALNT6     |
| TCN1       | FCGBP      |
| HYAL1      | LOXL4      |
| FLNC       | KYAT1      |
| ST3GAL4    | SLC39A8    |
| SERPINB4   | ST3GAL4    |
| RGS13      | DPP4       |
| SLC39A8    | MCUB       |
| DEFB1      | KCNK6      |
| CSTA       | EPS8L1     |
| SLC6A14    | STN1       |
| LCN2       | NOS2       |
| CD36       | ARHGAP40   |
| S100P      | CEACAM5    |
| CTSC       | SPDEF      |
| SH2D6      | CYP27B1    |

|            |            |
|------------|------------|
| ATOH8      | GALNT4     |
| RNASE1     | GGH        |
| DPP4       | ALOX15     |
| SH2D1B     | AL121761.1 |
| SFTPA2     | CTSC       |
| TRABD2A    | HS3ST1     |
| KCNE3      | NPDC1      |
| CST4       | LRRC31     |
| PYCR1      | GADD45G    |
| AL163636.2 | CEACAM21   |
| EPHX4      | SEC14L1    |
| TRPV6      | CD9        |
| HKDC1      | PLS1       |
| HGD        | SLC25A1    |
| LGALS7     | GNE        |
| SLC5A8     | TSPAN3     |
| AZGP1      | CDH26      |
| KRT23      | LINC01995  |
| TNFRSF13C  | BCL2L15    |
| VSIG1      | FUT3       |
| CD55       | CYTIP      |
| TIMP1      | DOK1       |
| FOXA3      | ATP12A     |
| CHRM1      | RAP1GAP    |
| MMP28      | LINC01269  |
| SLC7A11    | INSIG1     |

|             |            |
|-------------|------------|
| GPSM3       | SIRT7      |
| FAM177B     | KCNE3      |
| SERPINB11   | CAPN14     |
| HVCN1       | NOP53      |
| FA2H        | PPP4R1L    |
| HBEGF       | SERPINB4   |
| SERPINA11   | SUSD2      |
| AP002498.1  | KLF4       |
| GPX2        | TMC1       |
| TINAGL1     | GCNT3      |
| PTPRN2      | RPL7L1P8   |
| KDELR3      | PSTPIP1    |
| KIF21B      | OTOGL      |
| RPTN        | PARD3B     |
| ADM2        | ITPRID2    |
| PDE8B       | TRABD2A    |
| RHOH        | TRPV6      |
| SLC26A4-AS1 | ATOH8      |
| GCNT3       | DGKA       |
| AC090004.2  | ERVH-1     |
| TRPM5       | CAMK1D     |
| GNG13       | SLC12A2    |
| BCL2L15     | ADRA2A     |
| CHAD        | AL353807.5 |
| FXYD6       | HES4       |
| SLURP2      | AMN        |

|            |            |
|------------|------------|
| SH2D7      | AC007255.1 |
| ANO1       | AP000547.3 |
| CHAT       | TMPRSS2    |
| CYTIP      | UAP1       |
| AL121761.1 | PRB2       |
| CA2        | TLR4       |
| SLC26A4    | SLC9B2     |
| MZB1       | LGALS4     |
| TAS1R3     | MGAT3      |
| RCAN1      | ELOVL5     |
| CLDN22     | VWF        |
| UGT2A1     | FA2H       |
| IGSF22     | PRR15      |
| TMEM139    | ST6GAL1    |
| CST2       | CHCHD10    |
| CISH       | DHX32      |
| LRRC31     | HPGD       |
| GADD45G    | DUOX2      |
| SPDEF      | LINC01994  |
| DOK1       | NFE2       |
| TMEM211    | ALPL       |
| BDNF       | SLAMF6P1   |
| APOE       | TNIK       |
| ARHGAP40   | H1-10      |
| MPEG1      | SULF1      |
| GAREM2     | SERPINB11  |

|              |            |
|--------------|------------|
| ATP13A5      | TSPAN13    |
| FMOD         | AP001372.3 |
| RIMS3        | AC021055.1 |
| MSMB         | TMUB1      |
| BMX          | TMEM92     |
| PSTPIP1      | GDNF       |
| TFF1         | KANK3      |
| GDNF         | ALKAL1     |
| SEPTIN9-DT   | AL353807.3 |
| OR2I1P       | TMEM139    |
| NFE2         | HPDL       |
| SELP         | PHETA2     |
| NTAN1        | LINC00896  |
| C2CD4A       | MFSD4A     |
| NCF1C        | NAPRT      |
| ANO7         | DPP4-DT    |
| RIMKLA       | RETREG1    |
| CCL22        | SLC7A1     |
| CDH19        | CLLU1-AS1  |
| BX640514.2   | CREB3L1    |
| TMC1         | DQX1       |
| SH3PXD2A-AS1 | TMEM71     |
|              | ZNF467     |
|              | CD274      |
|              | FOLH1      |
|              | S100P      |

|  |            |
|--|------------|
|  | CYP2C9     |
|  | LBH        |
|  | HYAL1      |
|  | APOL4      |
|  | FGF13      |
|  | COLCA1     |
|  | ATP13A5    |
|  | HPCAL1     |
|  | SOX2       |
|  | KDEL3      |
|  | NUDT8      |
|  | CA2        |
|  | PACSIN1    |
|  | FAM177B    |
|  | ADAMTS9    |
|  | DAB2       |
|  | CNKSR3     |
|  | MAFF       |
|  | ORAI1      |
|  | AL358777.3 |
|  | ABCG2      |
|  | CLDN5      |
|  | SLC7A4     |
|  | AC020656.1 |
|  | PPP1R1B    |
|  | SIGLEC16   |

|  |            |
|--|------------|
|  | KIF1C      |
|  | AL163636.2 |
|  | SRARP      |
|  | ZNF579     |
|  | FER1L6     |
|  | SHISA8     |
|  | A4GALT     |
|  | LINC00866  |
|  | TYMP       |
|  | SCIN       |
|  | FLNC       |
|  | FZD5       |
|  | TENM2      |
|  | ANKRD9     |
|  | AC006059.2 |
|  | ADAM8      |
|  | SLC27A3    |
|  | CCDC85B    |
|  | PLA2G3     |
|  | AL583836.1 |
|  | NTRK2      |
|  | PYCR1      |
|  | CD36       |
|  | ANXA6      |
|  | KCNJ16     |
|  | TMEM178A   |



|  |             |
|--|-------------|
|  | OIT3        |
|  | NR4A1       |
|  | LINC01504   |
|  | RHOH        |
|  | FGF12       |
|  | CREB3L4     |
|  | SLC26A4-AS1 |
|  | SULT1C2     |
|  | NPSR1       |
|  | POU2AF1     |
|  | C1QTNF1     |
|  | AP002498.1  |
|  | ADCY4       |
|  | PKHD1L1     |
|  | PCSK6       |
|  | ABO         |
|  | ZNF205      |
|  | FLT1        |
|  | AADAC       |
|  | LYZ         |
|  | MYO1A       |
|  | TREML2      |
|  | AC246817.1  |
|  | ADM5        |
|  | SERPINB13   |
|  | TAT         |

|  |              |
|--|--------------|
|  | ABHD17A      |
|  | ARMC10       |
|  | ANG          |
|  | FAM3B        |
|  | LINP1        |
|  | LY75-CD302   |
|  | AC023024.1   |
|  | AHSG         |
|  | LDHD         |
|  | POSTN        |
|  | AL139317.3   |
|  | ITGA10       |
|  | EPS8L3       |
|  | SIDT1        |
|  | FBP1         |
|  | CYP1B1-AS1   |
|  | SLC29A4      |
|  | IL1RL2       |
|  | ARHGEF35-AS1 |
|  | SLC5A5       |
|  | SNORC        |
|  | TRIM7        |
|  | ADM2         |
|  | GTF2IRD2B    |
|  | KCND2        |
|  | VSIG2        |

May 2023

|  |            |
|--|------------|
|  | CERS1      |
|  | KAZALD1    |
|  | ZNF442     |
|  | CYP2G2P    |
|  | ANTKMT     |
|  | AL441992.3 |

ALI: air–liquid interface; BH: Benjamini–Hochberg; COPD: chronic obstructive pulmonary disease; FDR: false discovery rate; NGS: next-generation sequencing.

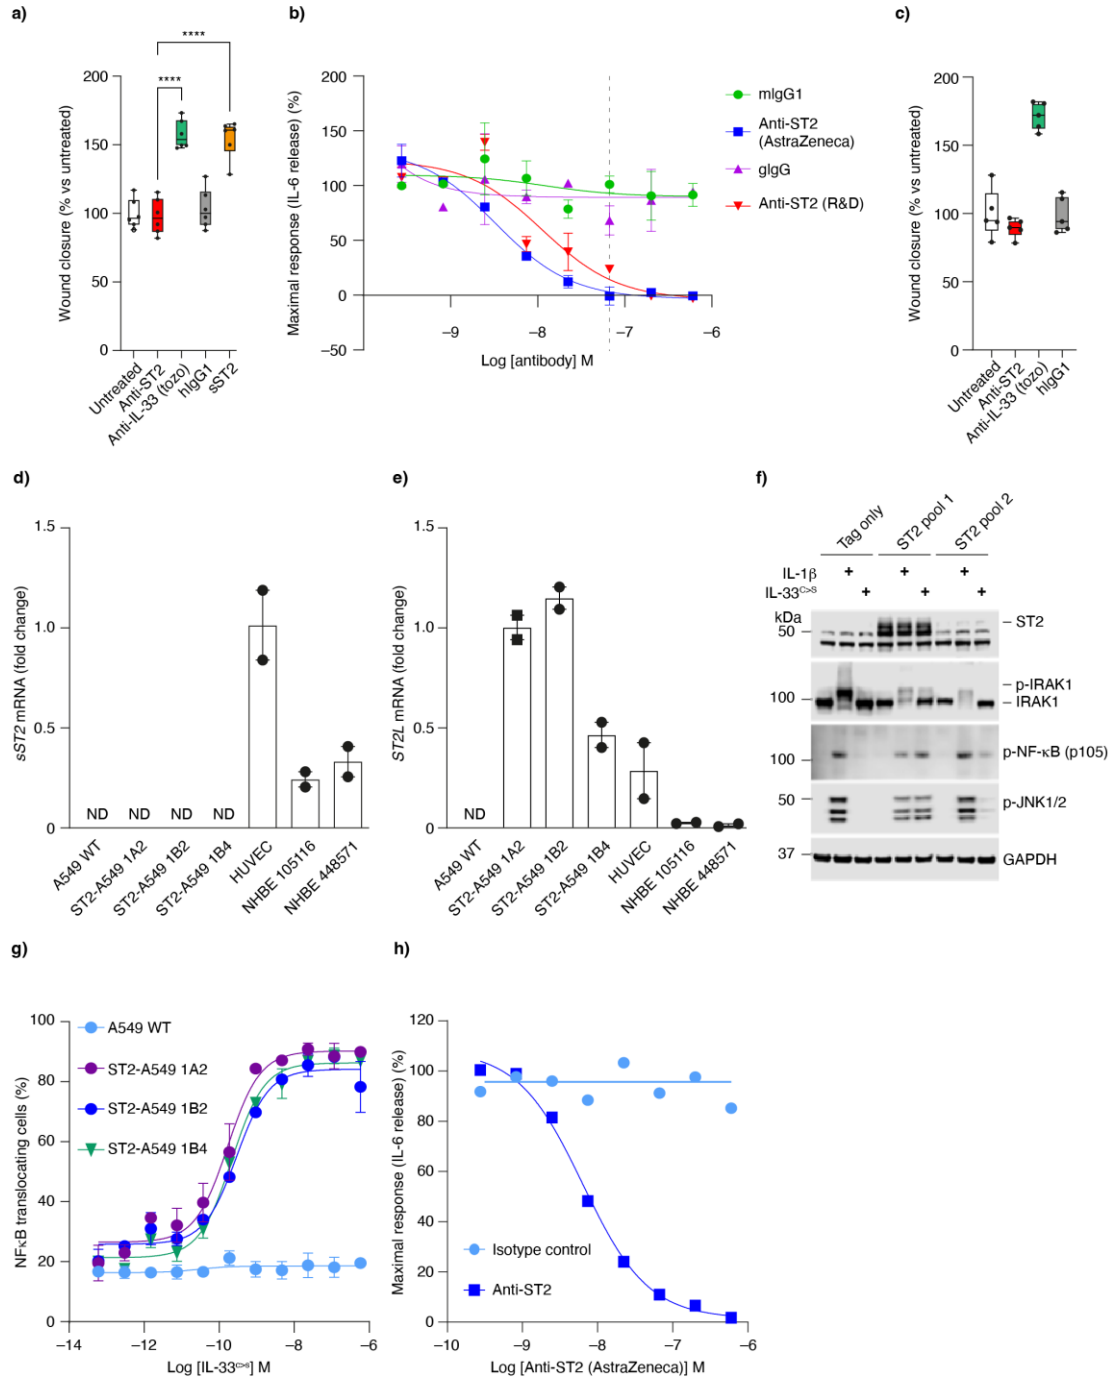

**Supplementary figure S1 IL-33<sup>ox</sup>-mediated response is independent of the ST2 receptor**

a) Scratch wound closure in growth factor starved submerged NHBE cells at 24 h following treatment with ST2-neutralising antibody (goat), IL-33-neutralising antibody (tozorakimab), hlgG1 isotype control antibody or sST2, versus untreated control (five individual donors). b) IL-6 release in HUVECs following 30 min pre-treatment with a titration of ST2-neutralising antibodies or isotype control antibodies, followed by 20 h stimulation with IL-33<sup>C>S</sup> (two replicate wells per condition). Vertical dotted line indicates the concentration of anti-ST2 antibody (AstraZeneca) required to achieve complete suppression of IL-6 release, used in figure 1a. c) Scratch wound closure in FCS-starved A549 cells at 24 h following treatment with ST2-neutralising antibody (goat), tozorakimab or hlgG1 isotype control antibody, versus untreated control (data points show individual wells). d) RT-qPCR of sST2 in A549 cells, A549 transduced with ST2 (clones 1A2, 1B2, 1B4), HUVECs and NHBE cells; data are normalised to HUVECs e) RT-qPCR of membrane-associated ST2 in A549 cells, A549 transduced with ST2, HUVECs and NHBE cells; data are normalised to A549 cells transduced with ST2. f) Western blot analysis of ST2, IRAK1, p-NF-κB and p-JNK1/2 in A549 epithelial cells transduced with tag alone or tagged ST2 cDNA (two pools of cells), stimulated with IL-1β or IL-33<sup>C>S</sup> for 10 min (GAPDH as a loading control). g) NF-κB translocation from the cytoplasm to the nucleus in A549 cells or clones (1A2, 1B2, 1B4) stably expressing ST2 following treatment with IL-33<sup>C>S</sup>. h) IL-6 release in A549 ST2 clone 1A2 pre-incubated with ST2-neutralising or isotype control antibodies, followed by treatment for 20 h with IL-33<sup>C>S</sup>. In panels a and c, box plots display median with single data points shown; data are normalised to untreated control. Further details on box plots and statistical analysis can be found in the supplementary materials and methods. \*\*\*\*p≤0.0001. In panels b and h, data are plotted as % of maximal response, where 20 h with IL-33<sup>C>S</sup> in the absence of any antibody is considered 100% response;

May 2023

data plotted as mean of duplicates $\pm$ SEM. In panels d and e, data are plotted as mean $\pm$ SEM. ND: not detected.

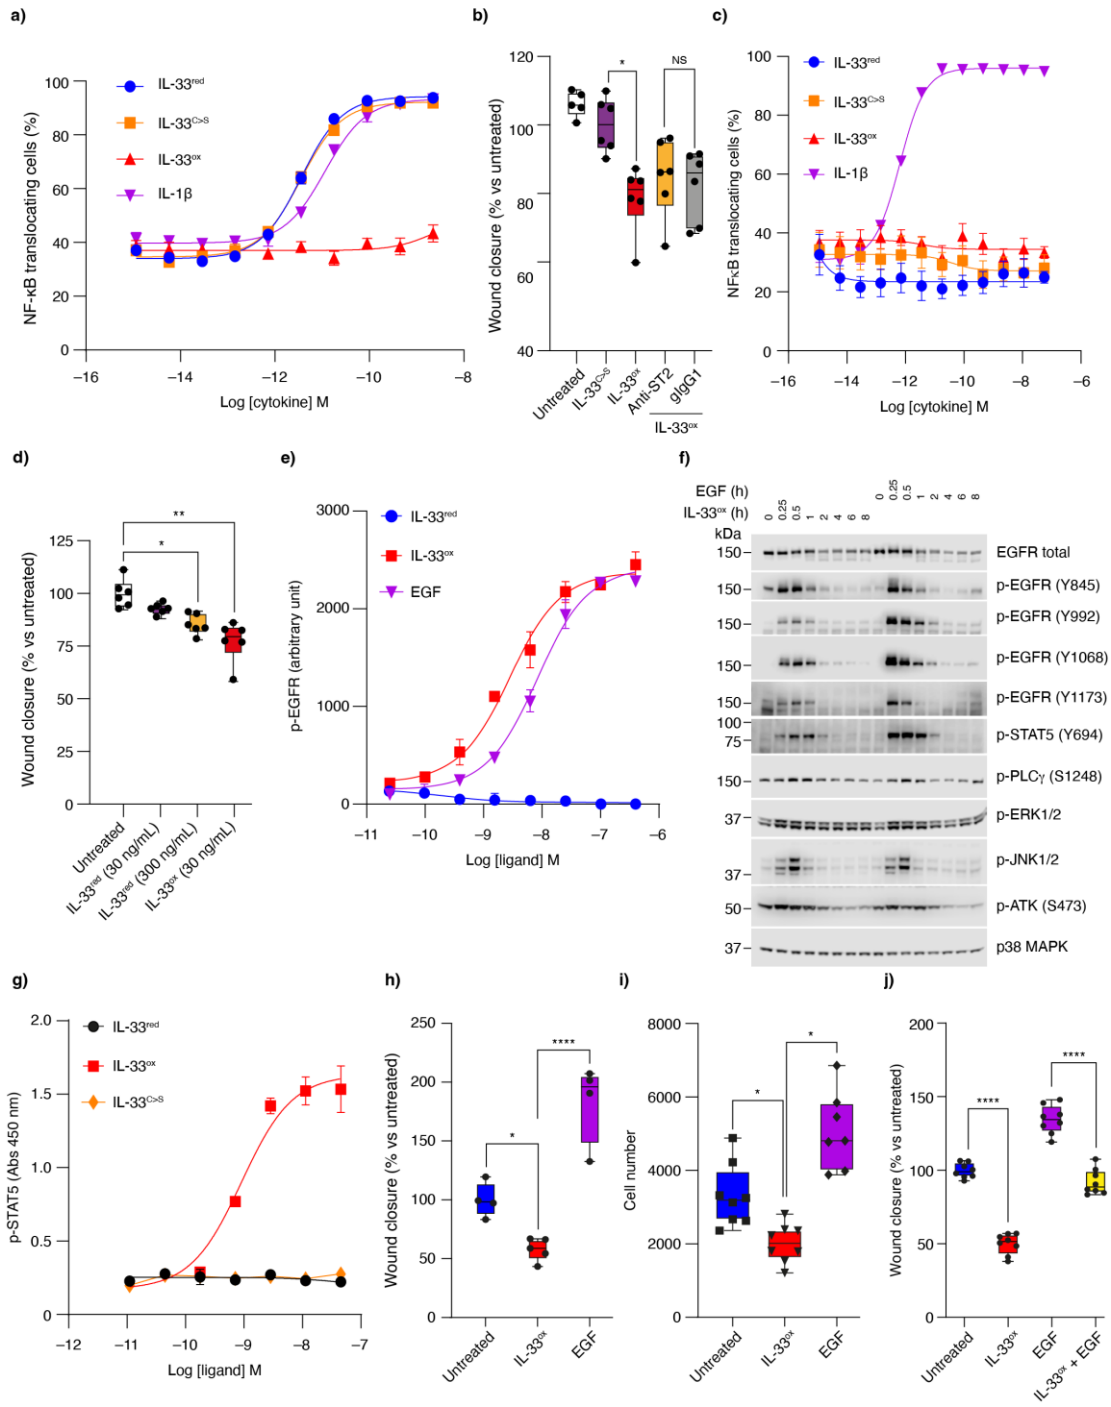

**Supplementary figure S2 IL-33<sup>ox</sup> impairs wound closure via EGFR signalling**

a) NF- $\kappa$ B translocation from the cytoplasm to the nucleus in ST2-expressing HUVECs following 30 min treatment with a titration of IL-33<sup>red</sup>, IL-33<sup>C>S</sup>, IL-33<sup>ox</sup> or IL-1 $\beta$  (two wells per data point). b) Scratch wound closure of A549 cells at 24 h following treatment with IL-33<sup>C>S</sup>, IL-33<sup>ox</sup>, IL-33<sup>ox</sup> + ST2-neutralising antibody or IL-33<sup>ox</sup> + gIgG1 isotype control antibody, versus untreated control. Data points show replicates; data are normalised to one replicate in the untreated control group. c) NF- $\kappa$ B translocation from the cytoplasm to the nucleus in A549 cells following 30 min treatment with a titration of IL-33<sup>red</sup>, IL-33<sup>C>S</sup>, IL-33<sup>ox</sup> or IL-1 $\beta$  (two wells per data point). d) Scratch wound closure at 24 h following treatment with increasing concentrations of IL-33<sup>red</sup> or IL-33<sup>ox</sup> versus untreated control in NHBE cells from healthy donors (six individual donors). e) HTRF measurement of p-EGFR following a 15 min titration of IL-33<sup>red</sup>, IL-33<sup>ox</sup> or EGF in NHBE cells (two wells per data point); arbitrary units. f) Western blot analysis of total EGFR, p-EGFR and key signalling molecules downstream of EGFR over time in A549 cells treated with EGF or IL-33<sup>ox</sup>. g) ELISA measurement of p-STAT5 following a 30 min titration of IL-33<sup>red</sup>, IL-33<sup>ox</sup> or IL-33<sup>C>S</sup> in A549 cells (two wells per data point); absorption at 450 nm shown. h) Scratch wound closure in NHBE cells at 24 h following treatment with IL-33<sup>ox</sup> or EGF, versus untreated control (four to five individual donors). i) Proliferation of A549 cells at 24 h following treatment with IL-33<sup>ox</sup> or EGF, or untreated control. Data points show replicates. j) Scratch wound closure in A549 cells at 24 h following treatment with IL-33<sup>ox</sup>, EGF or IL-33<sup>ox</sup> + EGF, versus untreated control. Data points show replicates. In panels a, c and g, error bars show SEM. Individual data points are shown in panels c, h, i and j, and further details of box plots and statistics can be found in the supplementary materials and methods. \* $p \leq 0.05$ ; \*\* $p \leq 0.01$ ; \*\*\* $p \leq 0.0001$ , NS: not significant.



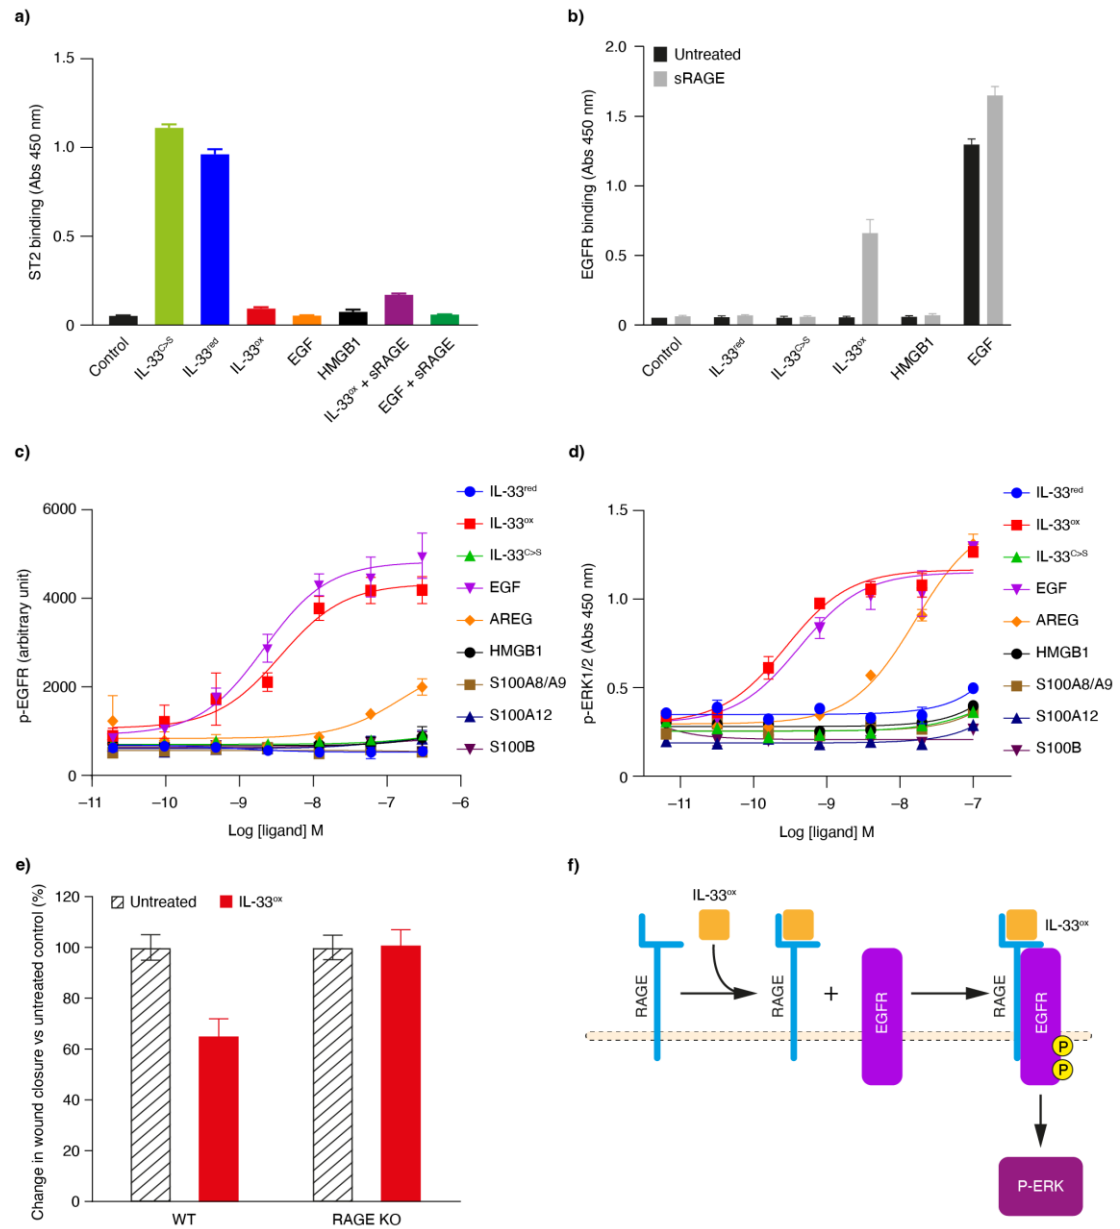

**Supplementary figure S3 Comparison of EGFR and RAGE ligands with IL-33<sup>ox</sup>**

a) Direct ELISA detecting binding of ST2-Fc to immobilised nonspecific control protein, IL-33<sup>C>S</sup>, IL-33<sup>red</sup>, IL-33<sup>ox</sup>, EGF or HMGB1 in the presence or absence of soluble RAGE. b) Direct MUC5AC detecting binding of EGFR-Fc to immobilised IL-33<sup>red</sup>, IL-33<sup>C>S</sup>, IL-33<sup>ox</sup>, HMGB1 or EGF in the presence or absence of soluble RAGE. c) HTRF analysis of p-EGFR levels in A549 cells stimulated with a titration of IL-33<sup>red</sup>, IL-33<sup>ox</sup>, IL-33<sup>C>S</sup>, EGF, AREG, HMGB1, S100A8/A9, S100A12 or S100B for 15 min (average of three independent experiments). d) ELISA analysis of p-ERK1/2 levels in A549 cells stimulated with a titration of IL-33<sup>red</sup>, IL-33<sup>ox</sup>, IL-33<sup>C>S</sup>, EGF, AREG, HMGB1, S100A8/A9, S100A12 or S100B for 15 min (average of three independent experiments). e) Change in scratch wound closure of A549 cells or RAGE KO A549 cells at 24 h following treatment with IL-33<sup>ox</sup> versus untreated control (data averaged from 12 wells). f) Schematic representation of IL-33<sup>ox</sup>, RAGE and EGFR protein complex. In panels a–e, error bars show SEM.

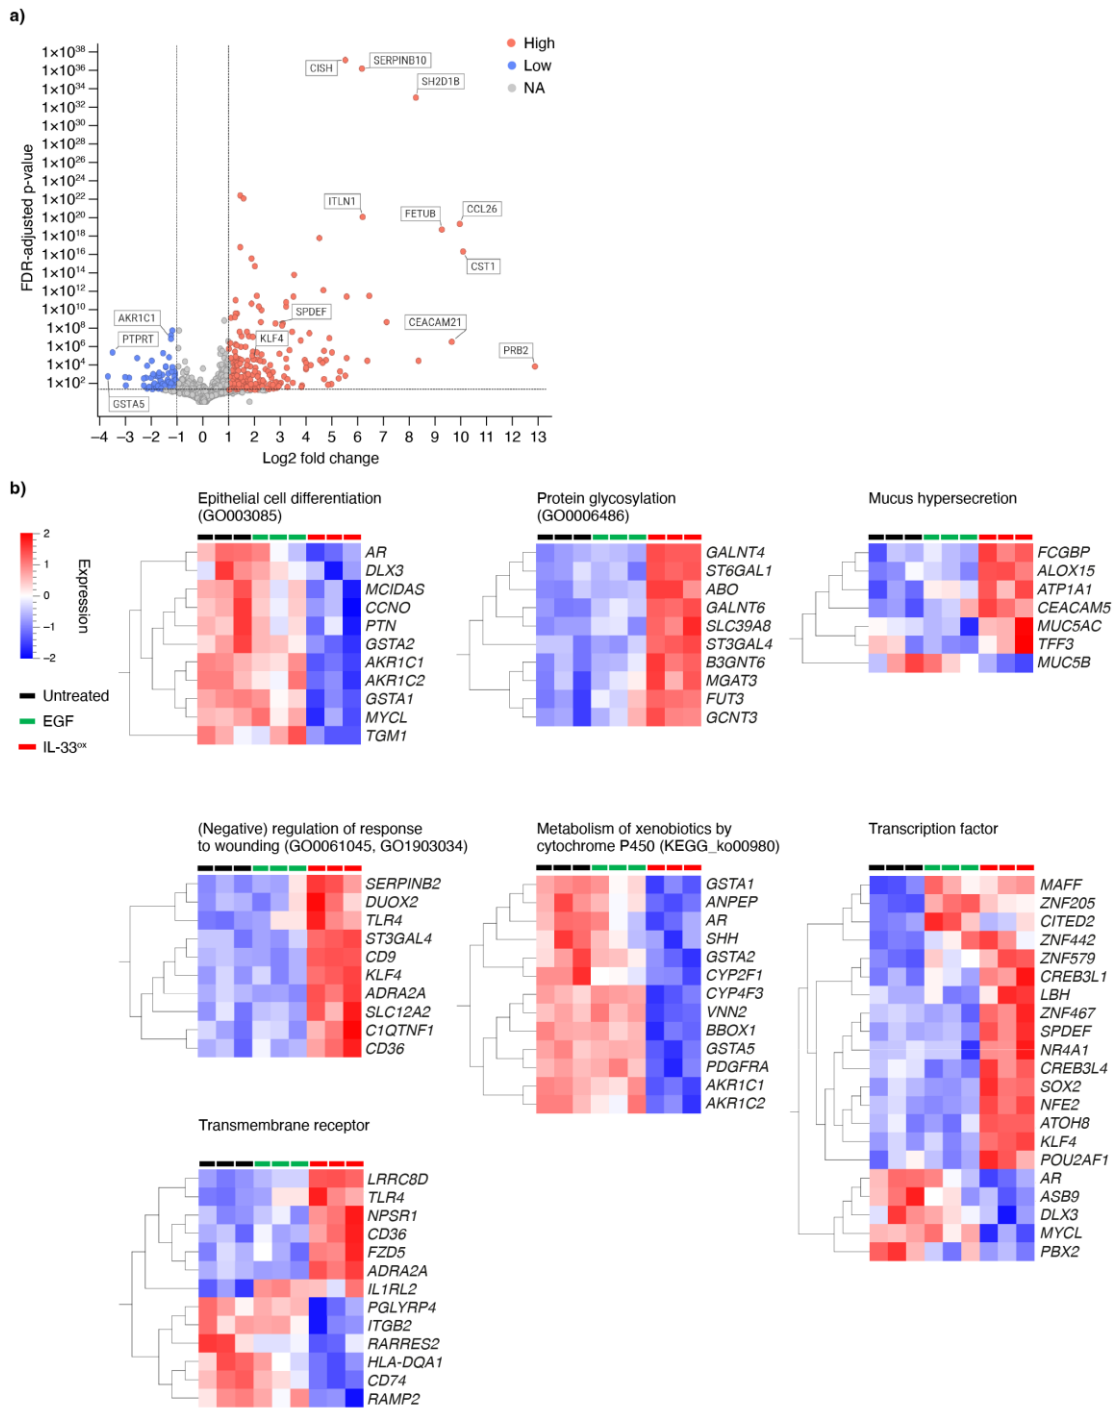

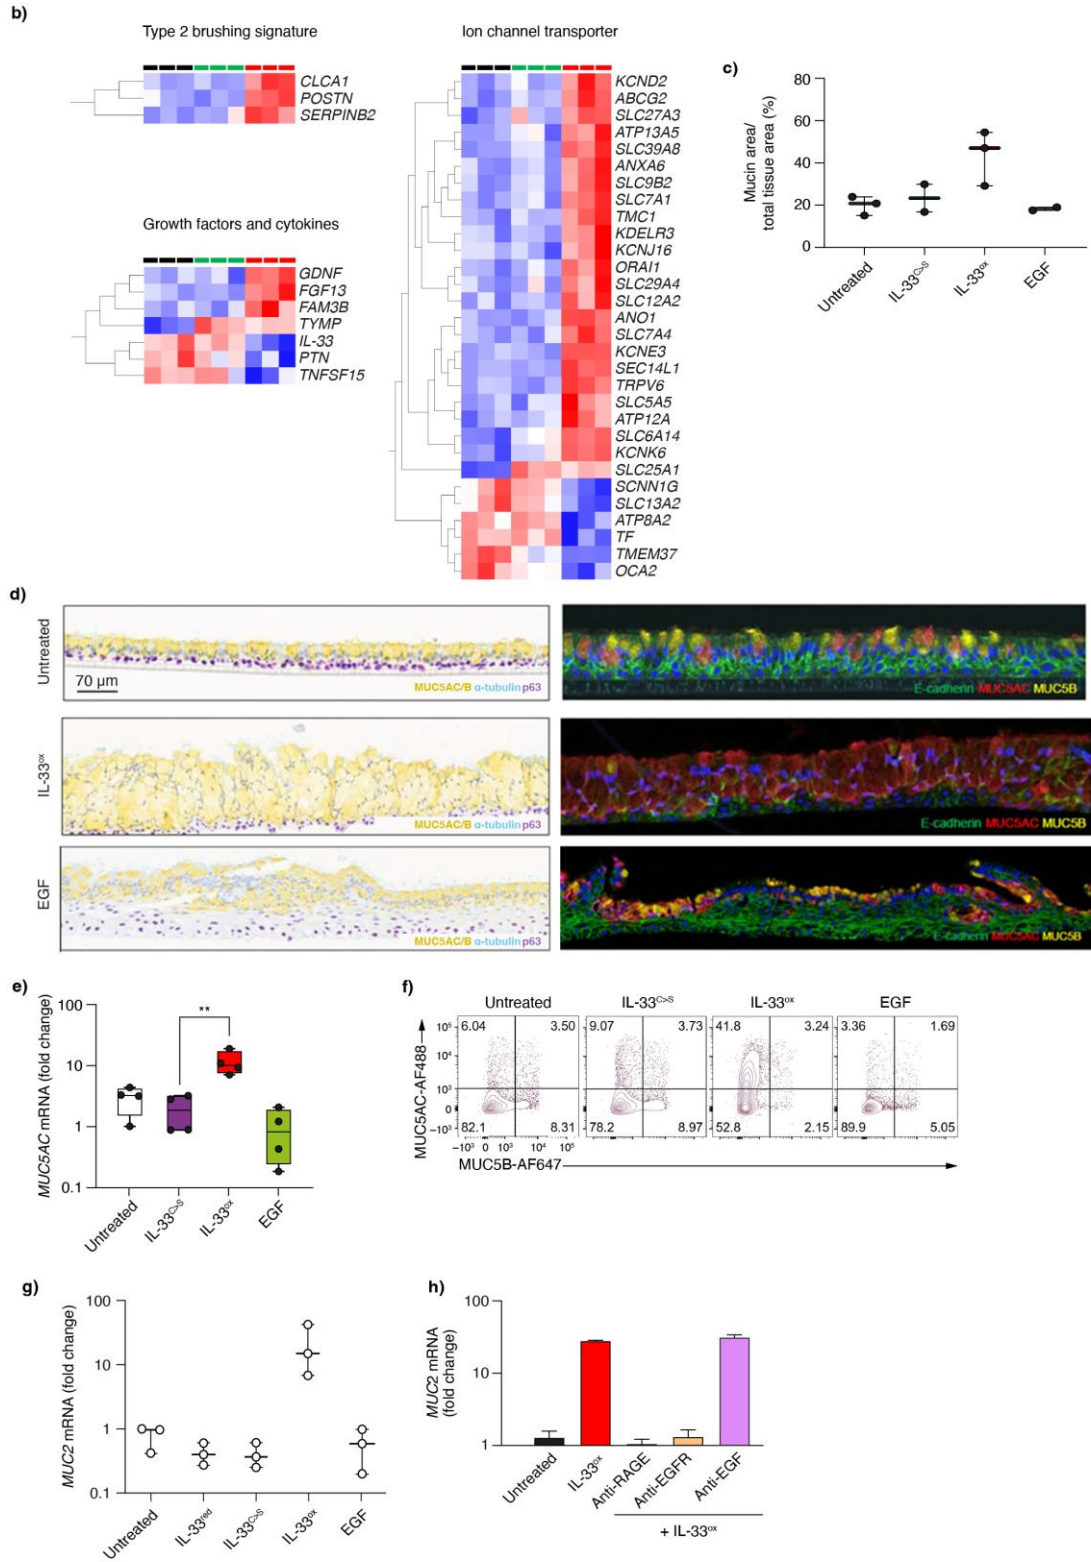

**Supplementary figure S4 IL-33<sup>ox</sup> induces transcriptional changes in bronchial epithelial ALI cultures as shown by bulk RNA analysis**

a) Volcano plot representing differential expression of genes from bulk RNA sequencing in ALI cultures treated with IL-33<sup>ox</sup> versus untreated control. b) Heat maps showing changes in gene expression levels by gene families in bronchial ALI cultures following treatment with IL-33<sup>ox</sup> or EGF, or untreated control (three individual donors). c) Quantification of mucin area from healthy donors treated with IL-33<sup>C>S</sup>, IL-33<sup>ox</sup> or EGF, or untreated control (two–three individual donors). d) Left panels, immunohistochemistry of healthy ALI cultures following treatment with IL-33<sup>ox</sup> or EGF, or untreated control. MUC5AC/B for goblet cells (yellow), acetylated  $\alpha$ -tubulin for ciliated cells (teal) and p63 for basal cells (purple). Right panels, immunofluorescence showing changes in MUC5AC (red), MUC5B (yellow) and tight junction (E-cadherin, green) levels in healthy ALI cultures or following treatment with IL-33<sup>ox</sup> or EGF, or untreated control (scale bar=70  $\mu$ m). e) *MUC5AC* expression determined by RT-qPCR in healthy bronchial ALI cultures treated with 30 ng/mL of IL-33<sup>C>S</sup>, IL-33<sup>ox</sup> or EGF, or untreated control for 7 days; for all conditions, media was changed every three days on the basal side of the ALI culture. Single data points from four individual donors shown; data are normalised to one donor in the untreated control group. f) Flow cytometry analysis of intracellular MUC5AC or MUC5B in dissociated bronchial ALI cultures following treatment with IL-33<sup>C>S</sup>, IL-33<sup>ox</sup> or EGF, or untreated control (seven individual donors). g) *MUC2* expression determined by RT-qPCR in ALI cultures following treatment with IL-33<sup>red</sup>, IL-33<sup>C>S</sup>, IL-33<sup>ox</sup> or EGF, or untreated control (three individual donors). Single data points from individual donors are shown; data are normalised to one donor in the untreated healthy control group. h) *MUC2* expression determined by RT-qPCR in ALI cultures following treatment with IL-33<sup>ox</sup> or IL-33<sup>ox</sup> + RAGE-neutralising, EGFR-neutralising or EGF-neutralising antibodies, or untreated control (two individual donors). In panels g and h, error bars

May 2023

show SEM. Individual data points are shown in panels c, and e, and further details of box plots can be found in the supplementary materials and methods. \*\* $p \leq 0.01$ .

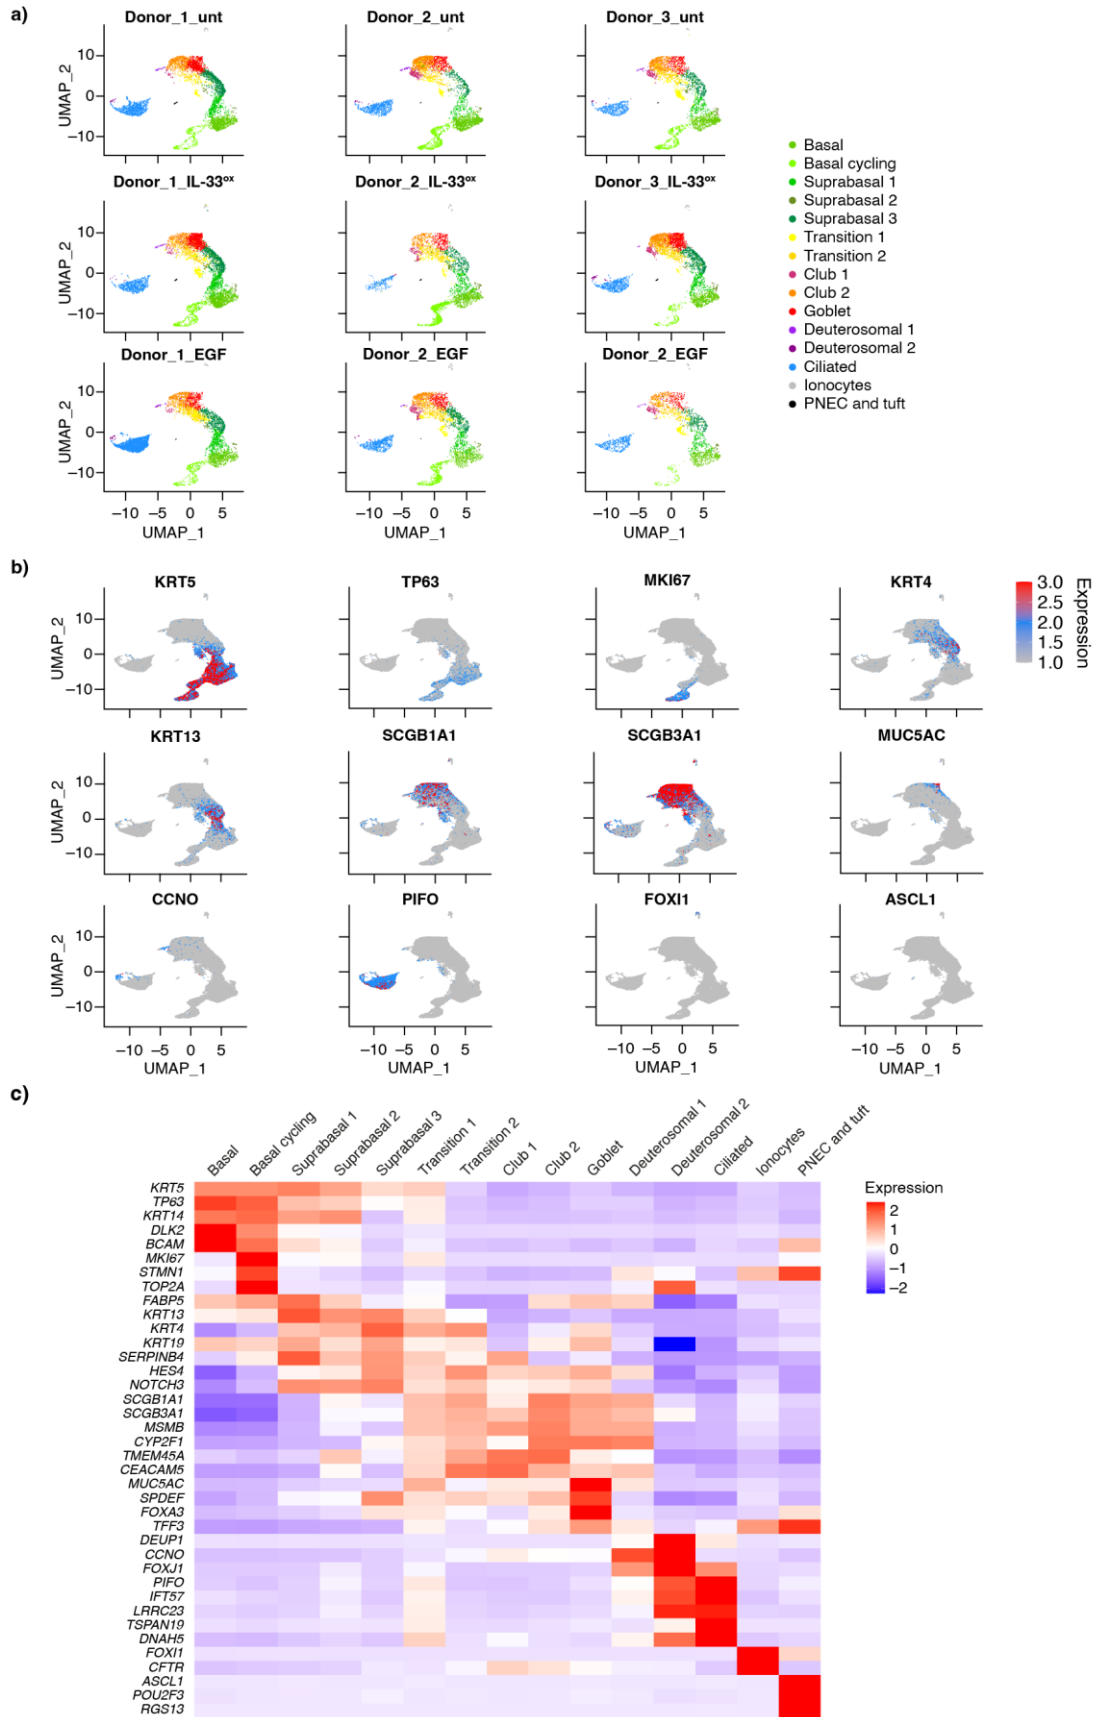

**Supplementary figure S5 Single-cell transcriptomic confirmation of airway epithelial cell state in healthy bronchial epithelial ALI cultures**

a) UMAP plots of healthy ALI cultures treated for 7 days with IL-33<sup>ox</sup> (n=3; 15 231 cells), EGF (n=3; 12 943 cells), or untreated control (n=3; 14 976 cells), displaying the annotated cell states/types. b) UMAP plots of healthy untreated ALI cultures depicting known cell markers for distinguished cell states in the airway epithelium. c) Heat map showing average expression levels of key genes used for cell state identification in healthy untreated ALI cultures.



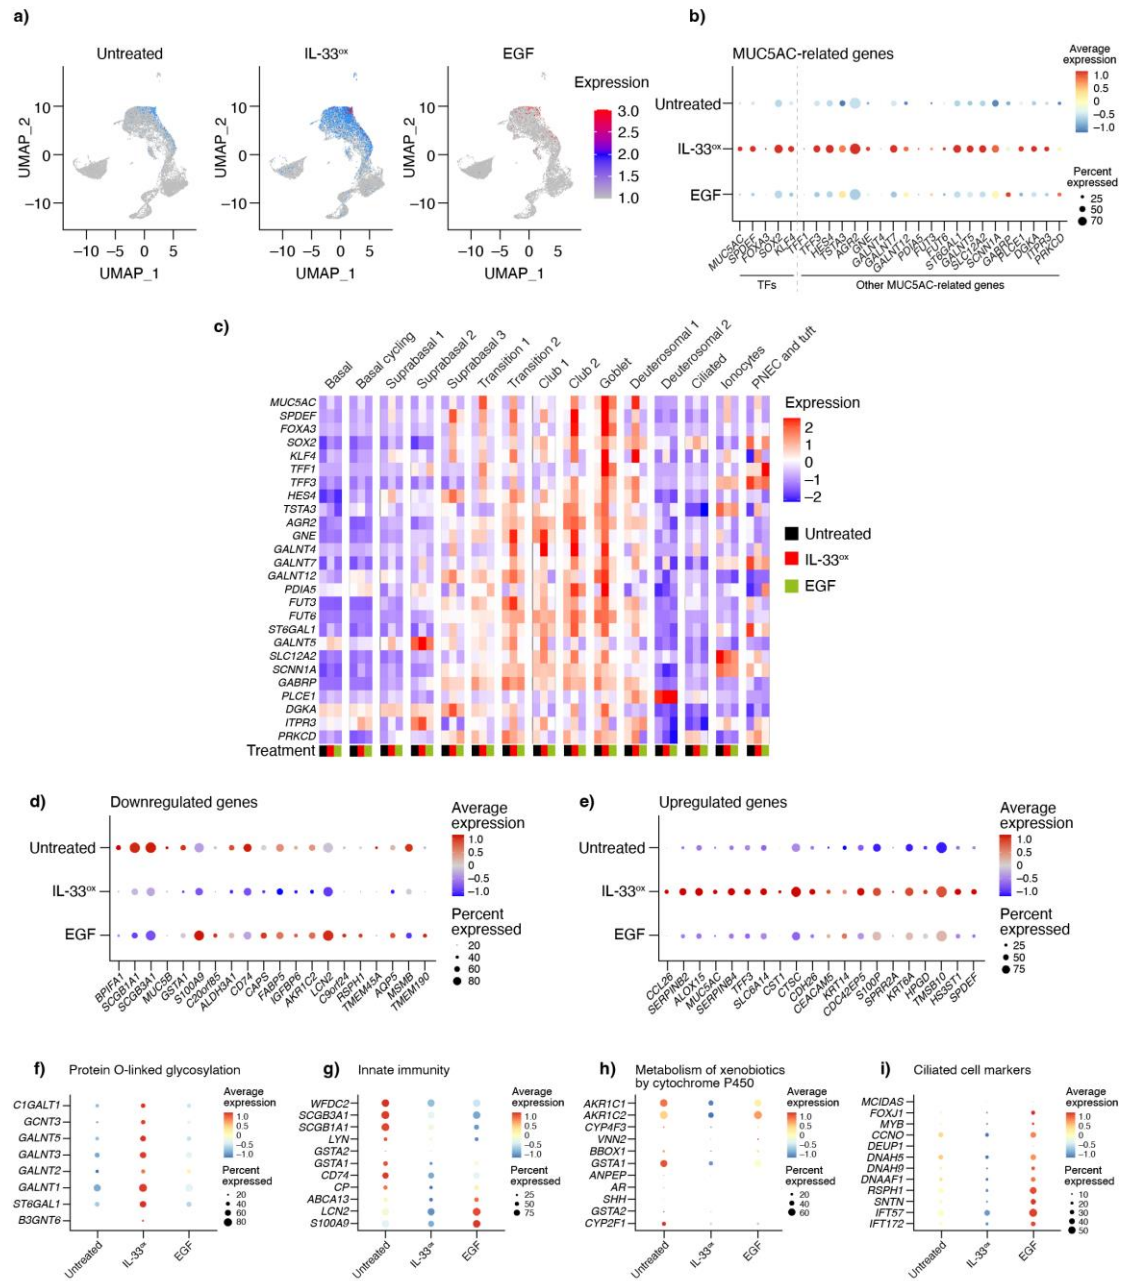

**Supplementary figure S6 IL-33<sup>ox</sup> induces transcriptional changes in bronchial epithelial ALI cultures as shown by single-cell transcriptomics**

a) UMAP plots showing SPDEF-expressing cells in ALI cultures after treatment with IL-33<sup>ox</sup> or EGF, versus untreated control. b) Dot plot showing the expression levels of MUC5AC-related genes in ALI cultures treated with IL-33<sup>ox</sup> or EGF, or untreated control. c) Heat map showing changes in gene expression levels measured by single-cell RNA analysis in ALI cultures in the annotated cell states/types following treatment with IL-33<sup>ox</sup> or EGF, or untreated control. d) Dot plot showing the most significantly downregulated genes in ALI cultures treated with IL-33<sup>ox</sup> or EGF, in comparison with untreated control, considering all cell states/types (Wilcoxon rank sum test,  $p \leq 0.001$ ). e) Dot plot showing the most significantly upregulated genes in ALI cultures treated with IL-33<sup>ox</sup> or EGF, in comparison with untreated control, considering all cell states/types (Wilcoxon rank sum test,  $p \leq 0.001$ ). f–i) Dot plots showing average expressions of genes involved in (f) protein glycosylation, (g) innate immunity, (h) P450 metabolism and (i) ciliated cell markers in healthy ALI cultures following treatment with IL-33<sup>ox</sup> or EGF, versus untreated controls. In panels b and d–i, the size of the dot represents the percentage of cells expressing the gene. TF: transcription factor.

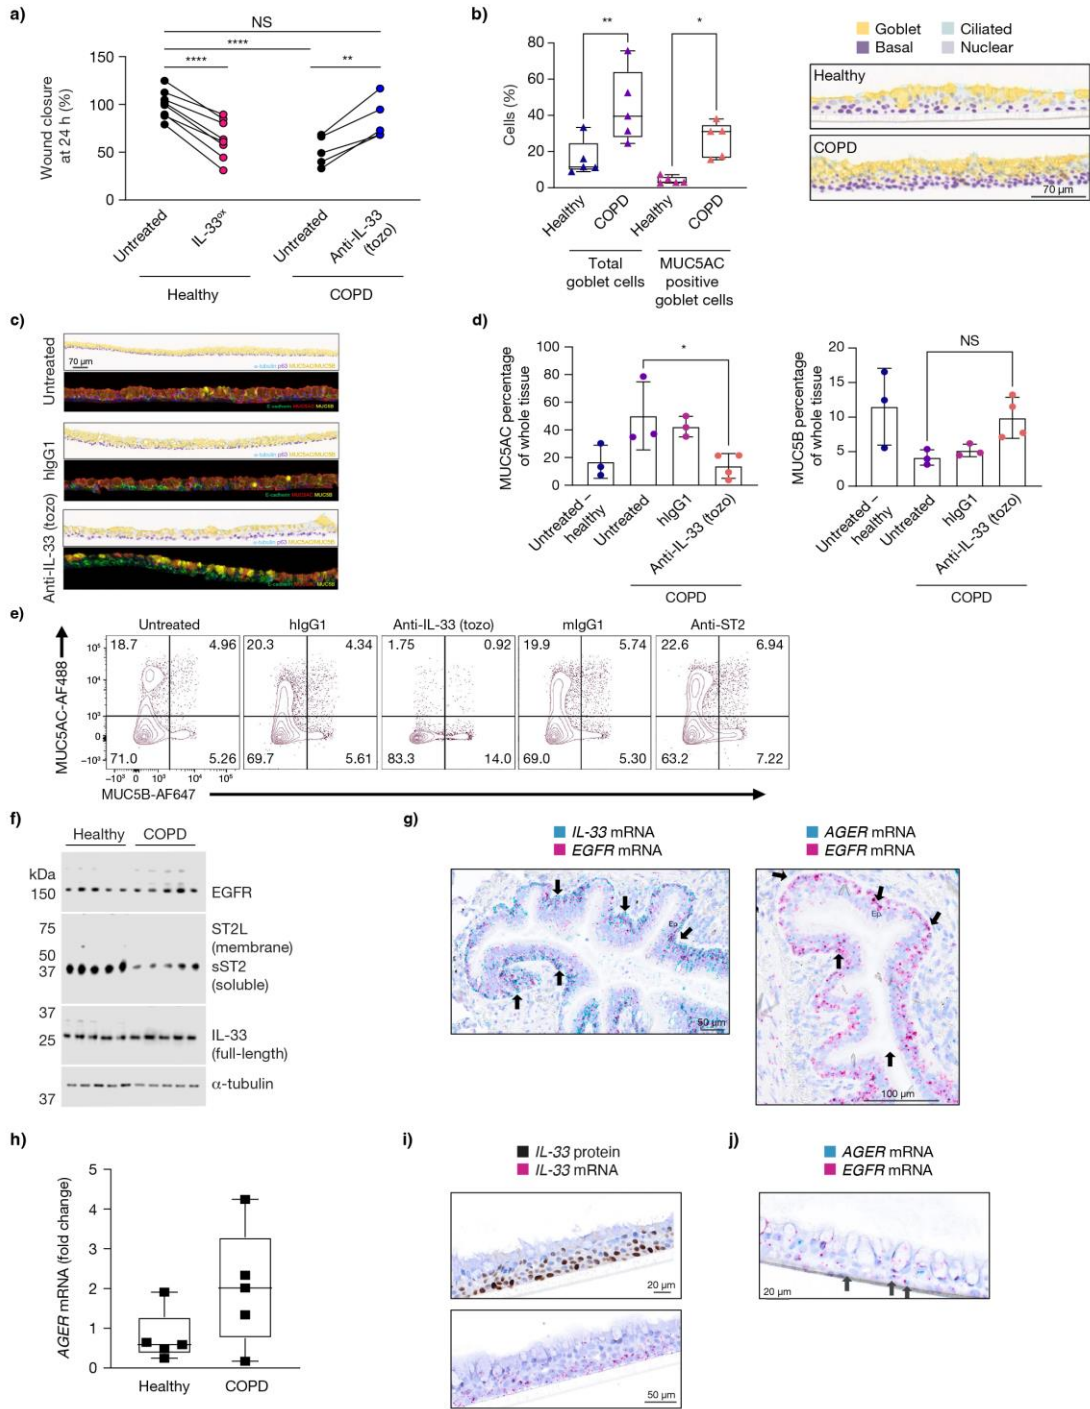

**Supplementary figure S7 The IL-33<sup>ox</sup>-RAGE/EGFR pathway is active in bronchial epithelial COPD ALI cultures and mediates mucin production**

a) Paired scratch wound closure in healthy human bronchial epithelial cells treated with IL-33<sup>ox</sup> or untreated control, and in COPD-diseased human bronchial epithelial cells treated with IL-33 neutralising antibody (tozorakimab) or untreated control (eight individual healthy donors, four individual COPD donors). b) Flow cytometry analysis (left) and immunohistochemistry (right) showing changes in goblet cell levels in healthy ALI cultures compared with COPD ALI cultures (scale bar=70  $\mu$ m) (five individual healthy donors, five individual COPD donors). c) Immunohistochemistry (top) of COPD ALI cultures treated with tozorakimab or hlgG1 isotype control antibody, or untreated control. MUC5AC/B for goblet cells (yellow), acetylated  $\alpha$ -tubulin for ciliated cells (teal) and p63 for basal cells (purple). Immunofluorescence (bottom) showing changes in MUC5AC (red), MUC5B (yellow) and tight junctions (E-cadherin, green) in COPD ALI cultures treated with tozorakimab or hlgG1 isotype control antibody, or untreated control (scale bar=70  $\mu$ m). d) Quantification of immunofluorescence showing increased MUC5AC-positive goblet cells in untreated COPD ALI cultures compared with healthy ALI cultures, and in COPD ALI cultures treated with hlgG1 isotype control antibody or tozorakimab (three individual healthy donors, three-four individual COPD donors). e) Flow cytometry analysis of intracellular MUC5AC and MUC5B in COPD ALI cultures treated with tozorakimab, ST2-neutralising or the relevant isotype control antibodies, or untreated control. f) Western blot analysis of EGFR, ST2L, sST2 and IL-33 levels in ALI cultures generated from healthy (five individual donors) and COPD (five individual donors) donors ( $\alpha$ -tubulin as a loading control). g) Simultaneous visualisation of small airway *EGFR* and *IL-33* mRNA (left, scale bar=50  $\mu$ m) and *AGER* (gene encoding RAGE protein) and *EGFR* mRNA (right, scale bar=100  $\mu$ m) by double chromogenic *in situ* hybridisation of lung sections from patients with COPD. h) *AGER* expression determined by RT-qPCR in healthy (five individual donors) or COPD (five

May 2023

individual donors) ALI cultures. i) Immunohistochemistry (top) of IL-33 protein (scale bar=20  $\mu\text{m}$ ) and *in situ* hybridisation detection (bottom) of *IL-33* mRNA in COPD ALI cultures (scale bar=50  $\mu\text{m}$ ). j) Double *in situ* hybridisation detection of *AGER* and *EGFR* mRNA in COPD ALI cultures (scale bar=20  $\mu\text{m}$ ). In panels b, d and h, error bars show SEM. \* $p \leq 0.05$ ; \*\* $p \leq 0.01$ ; \*\*\*\* $p \leq 0.0001$ . In panels b, d, and h, single data points from individual donors are shown; data are normalised to one donor in the healthy untreated control group. In panels g and j, arrows show representative cells double positive for the indicated mRNA. EP: epithelium; NS: not significant.

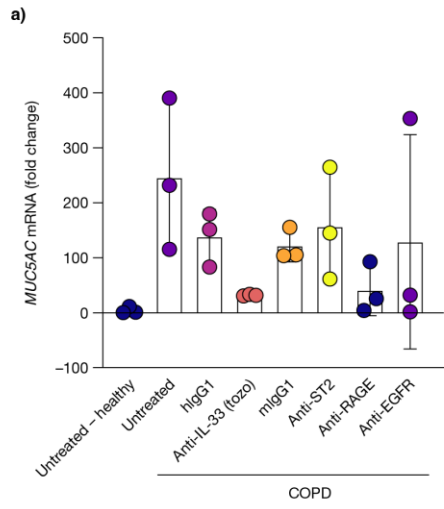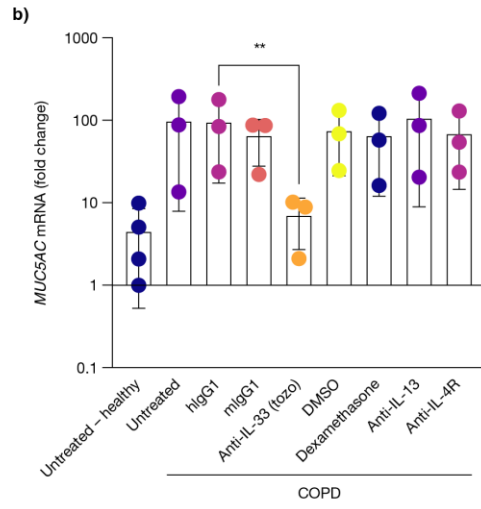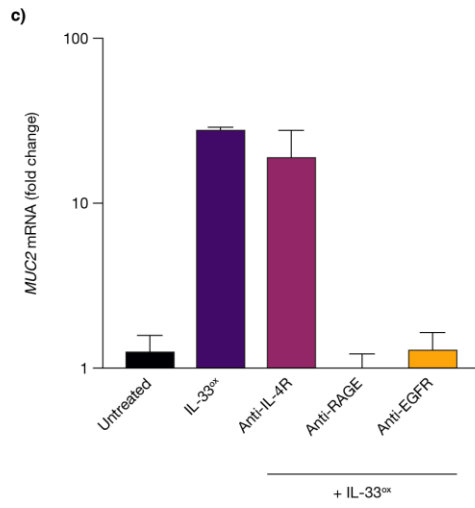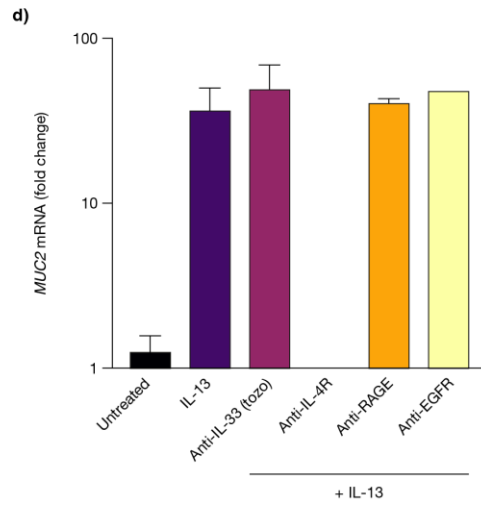

**Supplementary figure S8 IL-33<sup>ox</sup> induces transcriptional changes that are distinct from those induced by type 2 cytokines**

a) *MUC5AC* expression determined by RT-qPCR in healthy or COPD ALI cultures generated from small airway epithelial cells, incubated with IL-33-neutralising (tozorakimab), ST2-neutralising, RAGE-neutralising or EGFR-neutralising antibody or the relevant isotype control antibody, versus untreated control (three individual healthy and three individual COPD donors). b) As in panel a, except that ALI cultures were generated from bronchial epithelial cells, incubated with tozorakimab, DMSO, dexamethasone, anti-IL-13, anti-IL-4R or the relevant isotype control antibody, versus untreated control (four individual healthy and three individual COPD donors). c) *MUC2* expression determined by RT-qPCR in bronchial epithelial ALI cultures following treatment with IL-33<sup>ox</sup> or IL-33<sup>ox</sup> + anti-IL-4R, anti-RAGE or anti-EGFR, or untreated control (two individual healthy donors). d) *MUC2* expression determined by RT-qPCR in bronchial epithelial ALI cultures following treatment with IL-13 or IL-13 + tozorakimab, anti-IL-4R, anti-RAGE or anti-EGFR, or untreated control (two individual healthy donors). In panels a–d, error bars show SEM. \*\* $p \leq 0.01$ . In panels a and b, single data points from individual donors are shown; data are normalised to one healthy donor in the untreated control group.

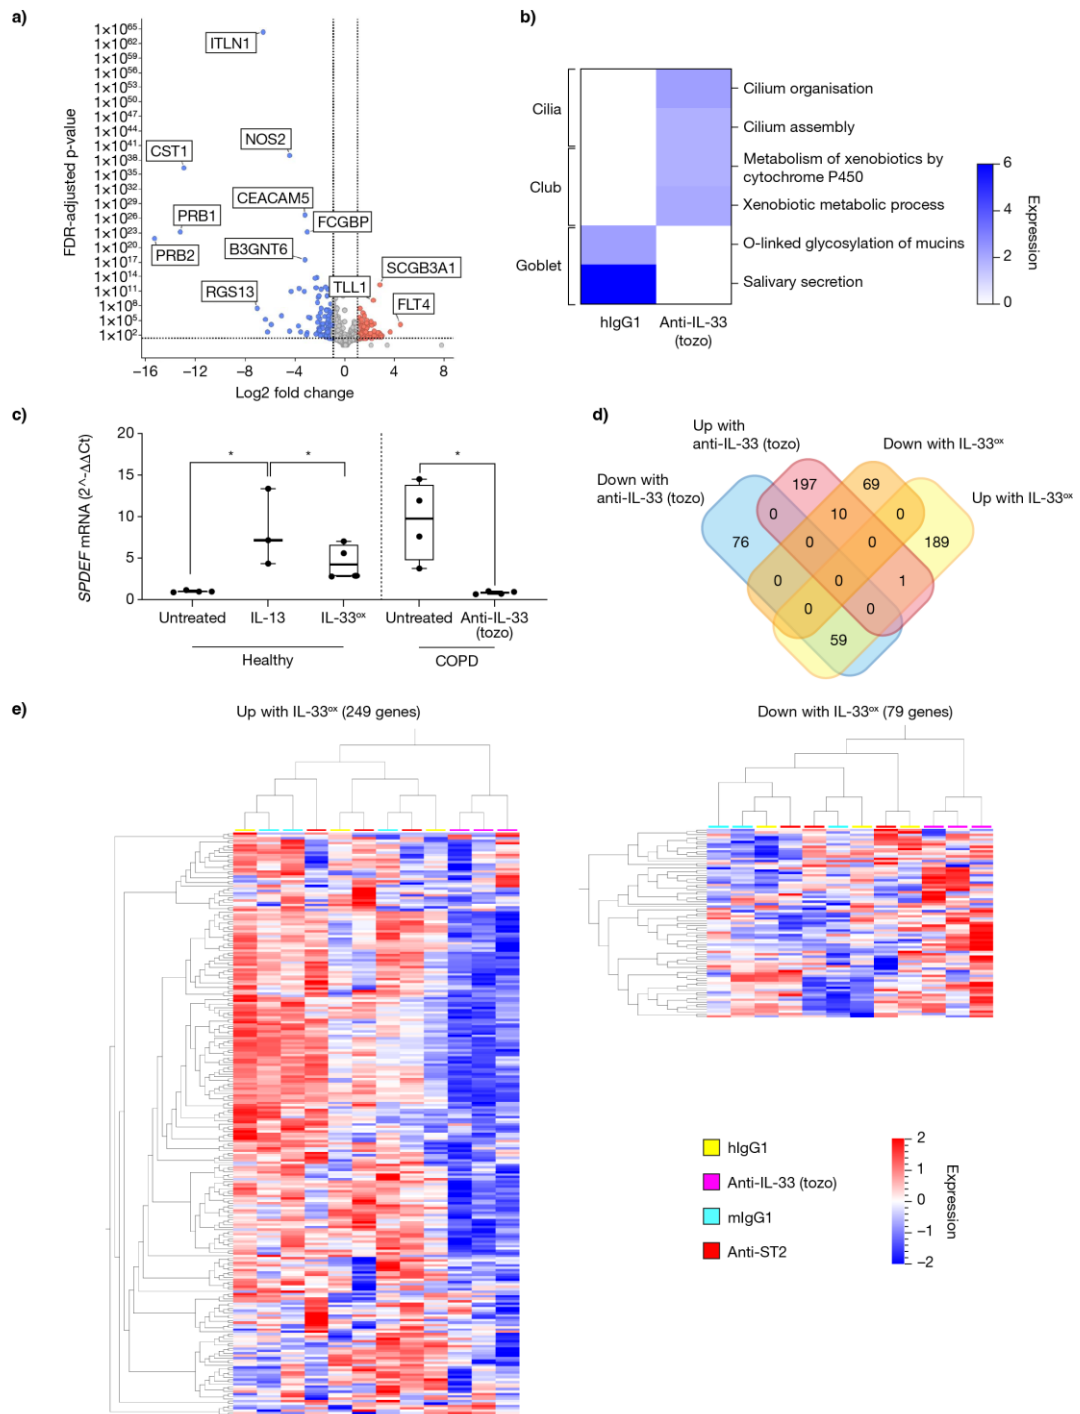



**Supplementary figure S9 Reciprocal gene expression profiles are apparent following anti-IL-33 treatment of COPD ALI cultures and IL-33<sup>ox</sup> treatment of healthy bronchial epithelial ALI cultures**

a) Volcano plot representing differential expression of genes from bulk RNA sequencing in COPD ALI cultures treated with IL-33-neutralising antibody (tozorakimab). b) Heat map showing changes in gene expression levels in COPD ALI cultures following treatment with hIgG1 isotype control antibody or tozorakimab by gene families. c) Expression levels of *SPDEF* in untreated healthy ALI cultures and those treated with IL-13 or IL-33<sup>ox</sup>, and COPD ALI cultures treated with tozorakimab or isotype control (n=3–4 donors). d) Venn diagram showing overlapping expression profile of genes upregulated with IL-33<sup>ox</sup> in healthy ALI cultures and genes downregulated with tozorakimab in COPD ALI cultures (greater than twofold change and 0.05 adjusted p-value [Benjamini–Hochberg false discovery rate]). e) Heat maps showing transcriptional changes in COPD ALI cultures after treatment with tozorakimab, ST2-neutralising or the relevant isotype control antibody.

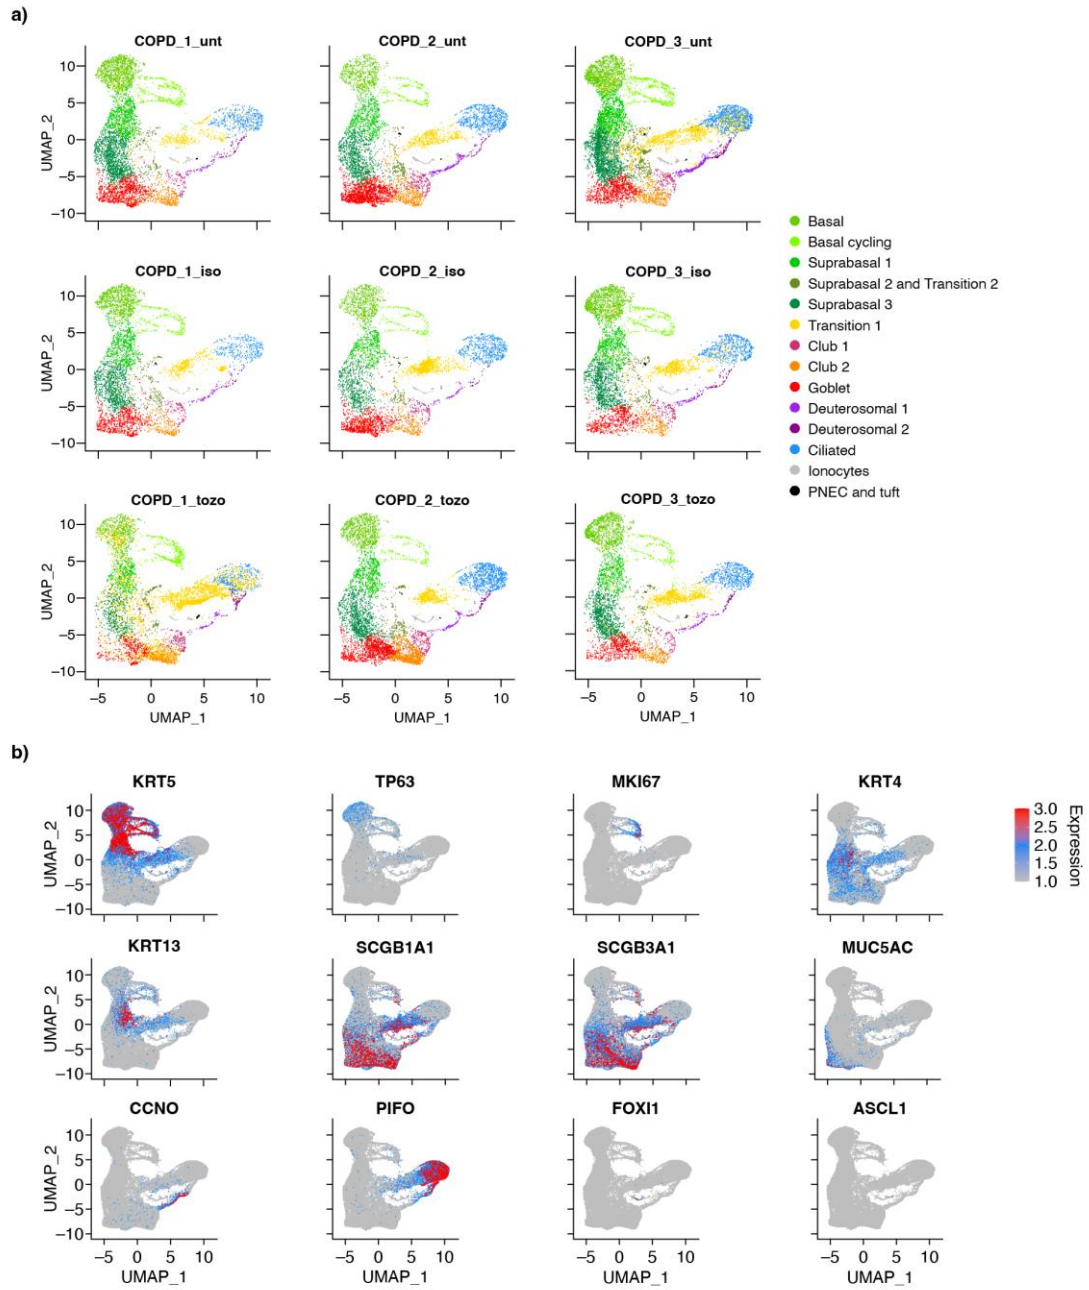

**Supplementary figure S10 Single-cell transcriptomic confirmation of airway epithelial cell state in COPD bronchial epithelial ALI cultures**

a) Single-cell RNA analysis showing proportions of cell states/types in untreated COPD ALI cultures (n=3; 23 390 cells) or after treatment with IL-33-neutralising antibody (tozorakimab) (n=3; 20 6244 cells) or hlgG1 isotype control antibody (n=3; 16 203 cells). b) UMAP plots of COPD ALI cultures depicting known cell markers for distinguished cell states in the airway epithelium.



**Supplementary figure S11 Analysis of inhibition of endogenous IL-33<sup>ox</sup> in COPD bronchial epithelial ALI cultures using single-cell analysis**

a) Stacked bar charts showing changes in cell types identified using single-cell analysis of untreated COPD ALI cultures or after treatment with IL-33-neutralising antibody (tozorakimab) or hlgG1 isotype control antibody. b) Dot plot showing the expression levels of distinct MUC5AC-related genes in COPD ALI cultures treated with tozorakimab or hlgG1 isotype control antibody, or untreated control (n=9; n=3 for each condition). c) Heat map showing changes in gene expression levels measured by single-cell RNA analysis in COPD ALI cultures in the annotated cell states/types following treatment with tozorakimab or hlgG1 isotype control, or untreated control. d) Dot plot showing changes in gene expression identified using single-cell analysis in COPD ALI cultures after treatment with tozorakimab or hlgG1 isotype control antibody, or untreated control. e) Dot plot showing average expressions of genes involved in innate immunity in COPD ALI cultures following treatment with tozorakimab or hlgG1 isotype control, in comparison with untreated controls. f) Dot plot showing average expressions of genes involved in P450 metabolism in COPD ALI cultures following treatment with tozorakimab or hlgG1 isotype control, in comparison with untreated controls. g and h) Dot plots showing scaled expression changes of genes found to be downregulated (g) and upregulated (h) with IL-33<sup>ox</sup>. In panels b, d, e, f, g and h, the size of the dot represents the percentage of cells expressing the gene.

## References

1. Ewels P, Magnusson M, Lundin S, Kaller M. MultiQC: summarize analysis results for multiple tools and samples in a single report. *Bioinformatics* 2016; 32: 3047–3048.
2. Dobin A, Davis CA, Schlesinger F, Drenkow J, Zaleski C, Jha S, Batut P, Chaisson M, Gingeras TR. STAR: ultrafast universal RNA-seq aligner. *Bioinformatics* 2013; 29: 15–21.
3. Gaspar JM. NGmerge: merging paired-end reads via novel empirically-derived models of sequencing errors. *BMC Bioinformatics* 2018; 19: 536.
4. Patro R, Duggal G, Love MI, Irizarry RA, Kingsford C. Salmon provides fast and bias-aware quantification of transcript expression. *Nat Methods* 2017; 14: 417–419.
5. Di Tommaso P, Chatzou M, Floden EW, Barja PP, Palumbo E, Notredame C. Nextflow enables reproducible computational workflows. *Nat Biotechnol* 2017; 35: 316–319.
6. Gruning B, Dale R, Sjodin A, Chapman BA, Rowe J, Tomkins-Tinch CH, Valieris R, Koster J, Bioconda T. Bioconda: sustainable and comprehensive software distribution for the life sciences. *Nat Methods* 2018; 15: 475–476.
7. Love MI, Huber W, Anders S. Moderated estimation of fold change and dispersion for RNA-seq data with DESeq2. *Genome Biol* 2014; 15: 550.
8. Zhu A, Ibrahim JG, Love MI. Heavy-tailed prior distributions for sequence count data: removing the noise and preserving large differences. *Bioinformatics* 2019; 35: 2084–2092.
9. Storey JD, Tibshirani R. Statistical significance for genomewide studies. *Proc Natl Acad Sci USA* 2003; 100: 9440–9445.
10. Hanzelmann S, Castelo R, Guinney J. GSEA: gene set variation analysis for microarray and RNA-seq data. *BMC Bioinformatics* 2013; 14: 7.
11. Steiling K, van den Berge M, Hijazi K, Florido R, Campbell J, Liu G, Xiao J, Zhang X, Duclos G, Drizik E, Si H, Perdomo C, Dumont C, Coxson HO, Alekseyev YO, Sin D, Pare P, Hogg JC, McWilliams A, Hiemstra PS, Sterk PJ, Timens W, Chang JT, Sebastiani P, O'Connor GT, Bild AH, Postma DS, Lam S, Spira A, Lenburg ME. A dynamic bronchial airway gene expression signature of chronic obstructive pulmonary disease and lung function impairment. *Am J Respir Crit Care Med* 2013; 187: 933–942.

12. Tilley AE, O'Connor TP, Hackett NR, Strulovici-Barel Y, Salit J, Amoroso N, Zhou XK, Raman T, Omberg L, Clark A, Mezey J, Crystal RG. Biologic phenotyping of the human small airway epithelial response to cigarette smoking. *PLoS One* 2011; 6: e22798.
13. Tan J, Tedrow JR, Dutta JA, Juan-Guardela B, Nourai M, Chu Y, Trejo Bittar H, Ramani K, Biswas PS, Veraldi KL, Kaminski N, Zhang Y, Kass DJ. Expression of RXFP1 is decreased in idiopathic pulmonary fibrosis. Implications for relaxin-based therapies. *Am J Respir Crit Care Med* 2016; 194: 1392–1402.
14. Stuart T, Butler A, Hoffman P, Hafemeister C, Papalexi E, Mauck WM, 3rd, Hao Y, Stoeckius M, Smibert P, Satija R. Comprehensive integration of single-cell data. *Cell* 2019; 177: 1888–1902.e1821.
15. Deprez M, Zaragosi L-E, Truchi M, Becavin C, García SR, Arguel M-J, Plaisant M, Magnone V, Lebrigand K, Abelanet S, Brau F, Paquet A, Pe'er D, Marquette C-H, Leroy S, Barbry P. A single-cell atlas of the human healthy airways. *Am J Respir Crit Care Med* 2020; 202: 1636–1645.
16. Jackson ND, Everman JL, Chioccioli M, Feriani L, Goldfarbmuren KC, Sajuthi SP, Rios CL, Powell R, Armstrong M, Gomez J, Michel C, Eng C, Oh SS, Rodriguez-Santana J, Cicuta P, Reisdorph N, Burchard EG, Seibold MA. Single-cell and population transcriptomics reveal pan-epithelial remodeling in type 2-high asthma. *Cell Rep* 2020; 32: 107872.
17. Travaglini KJ, Nabhan AN, Penland L, Sinha R, Gillich A, Sit RV, Chang S, Conley SD, Mori Y, Seita J, Berry GJ, Shrager JB, Metzger RJ, Kuo CS, Neff N, Weissman IL, Quake SR, Krasnow MA. A molecular cell atlas of the human lung from single-cell RNA sequencing. *Nature* 2020; 587: 619–625.
18. Ruiz García S, Deprez M, Lebrigand K, Cavard A, Paquet A, Arguel M-J, Magnone V, Truchi M, Caballero I, Leroy S, Marquette C-H, Marcet B, Barbry P, Zaragosi L-E. Novel dynamics of human mucociliary differentiation revealed by single-cell RNA sequencing of nasal epithelial cultures. *Development* 2019; 146: dev177428.
19. Vieira Braga FA, Kar G, Berg M, Carpaij OA, Polanski K, Simon LM, Brouwer S, Gomes T, Hesse L, Jiang J, Fasouli ES, Efremova M, Vento-Tormo R, Talavera-López C, Jonker MR, Affleck K, Palit S, Strzelecka PM, Firth HV, Mahbubani KT, Cvejic A, Meyer KB, Saeb-Parsy K, Luinge M, Brandsma C-A, Timens W, Angelidis I, Strunz M, Koppelman GH,

May 2023

van Oosterhout AJ, Schiller HB, Theis FJ, van den Berge M, Nawijn MC, Teichmann SA. A cellular census of human lungs identifies novel cell states in health and in asthma. *Nat Med* 2019; 25: 1153–1163.
